## 1 Network analysis outlines strengths and weaknesses of emerging SARS-CoV-2 Spike variants

2 P.D. Manrique<sup>1</sup>, S. Chakraborty<sup>1,2</sup>, K. Nguyen<sup>1</sup>, R. Mansbach<sup>3</sup>, B. Korber<sup>1</sup>, S. Gnanakaran<sup>1,\*</sup>

3 <sup>1</sup> *Theoretical Biology and Biophysics Group, Los Alamos National Laboratory, Los Alamos, NM 87545, U.S.A.*

4 <sup>2</sup> *Center for Nonlinear Studies, Los Alamos National Laboratory, Los Alamos, NM 87545, U.S.A.*

5 <sup>3</sup> *Physics Department, Concordia University, Montreal, Quebec, Canada, H4B IR6*

6 \*Correspondence: gnana@lanl.gov (SG)

7 **The COVID-19 pandemic, caused by the SARS-CoV-2 virus, has triggered myriad efforts to dissect**  
8 **and understand the structure and dynamics of this complex pathogen. The Spike glycoprotein of**  
9 **SARS-CoV-2 has received special attention as it is the means by which the virus enters the human**  
10 **host cells. The N-terminal domain (NTD) is one of the targeted regions of the Spike protein for ther-**  
11 **apeutics and neutralizing antibodies against COVID-19. Though its function is not well-understood,**  
12 **the NTD is reported to acquire mutations and deletions that can accelerate the evolutionary adapta-**  
13 **tion of the virus driving antibody escape. Cellular processes are known to be regulated by complex**  
14 **interactions at the molecular level, which can be characterized by means of a graph representation**  
15 **facilitating the identification of key residues and critical communication pathways within the molec-**  
16 **ular complex. From extensive all-atom molecular dynamics simulations of the entire Spike for the**  
17 **wild-type and the dominant variant, we derive a weighted graph representation of the protein in two**  
18 **dominant conformations of the receptor-binding-domain; all-down and one-up. We implement graph**  
19 **theory techniques to characterize the relevance of specific residues at facilitating roles of communi-**  
20 **cation and control, while uncovering key implications for fitness and adaptation. We find that many**  
21 **of the reported high-frequency mutations tend to occur away from the critical residues highlighted**  
22 **by our graph theory analysis, implying that these mutations tend to avoid targeting residues that**  
23 **are most critical for protein allosteric communication. We propose that these critical residues could**  
24 **be candidate targets for novel antibody therapeutics. In addition, our analysis provides quantitative**  
25 **insights of the critical role of the NTD and furin cleavage site and their wide-reaching influence over**  
26 **the protein at large. Many of our conclusions are supported by empirical evidence while others point**  
27 **the way towards crucial simulation-guided experiments.**

## 29 INTRODUCTION

30 The emergence and subsequent worldwide spread of the severe acute respiratory syndrome coronavirus  
31 2 (SARS-CoV-2) causing COVID-19 [1,2] is a global health emergency that, according to the World  
32 Health Organization, has taken more than 4 million lives as of July 16, 2021 [3]. COVID-19 is a highly  
33 contagious respiratory illness initiated by viral entry into host cells prior to infection and symptoms.  
34 The first event in viral entry is contingent upon the binding of the Spike glycoprotein, located at the  
35 surface of the SARS-CoV-2 pathogen, with the human host receptor angiotensin-converting enzyme 2  
36 (ACE2) [4–6].

37  
38 The Spike is a homotrimeric class I viral fusion protein able to adopt different conformations according  
39 to the state of the receptor-binding-domain (RBD) of each of its protomers. It has been determined by  
40 cryo-electron microscopy at the atomic level [7] that the Spike adopts two predominant conformations  
41 in which either all three protomers are in a closed state (all-down conformation), or one protomer is  
42 in an open state while the remaining two are in a closed state (one-up conformation). The one-up  
43 conformation promotes host receptor binding due to heightened exposure of the binding site region of  
44 the virus (the receptor binding domain or RBD). Each protomer of the Spike comprises around 1200  
45 residues in the extracellular domain that can be grouped into two main functional subunits S1 and  
46 S2 delimited by the furin cleavage sites (FCS) loop at residues 675-690. The S1 subunit comprises  
47 the RBD that carries out the recognition and binding process to the ACE2 protein host in the hu-  
48 man lung [8–10]. On the other hand, the S2 subunit manages viral-host-cell membrane fusion and  
49 subsequent viral entry. As we have done previously [11], we divide each subunit further for analysis,  
50 yielding a total of 12 domains for each protomer [Fig. 1].

51

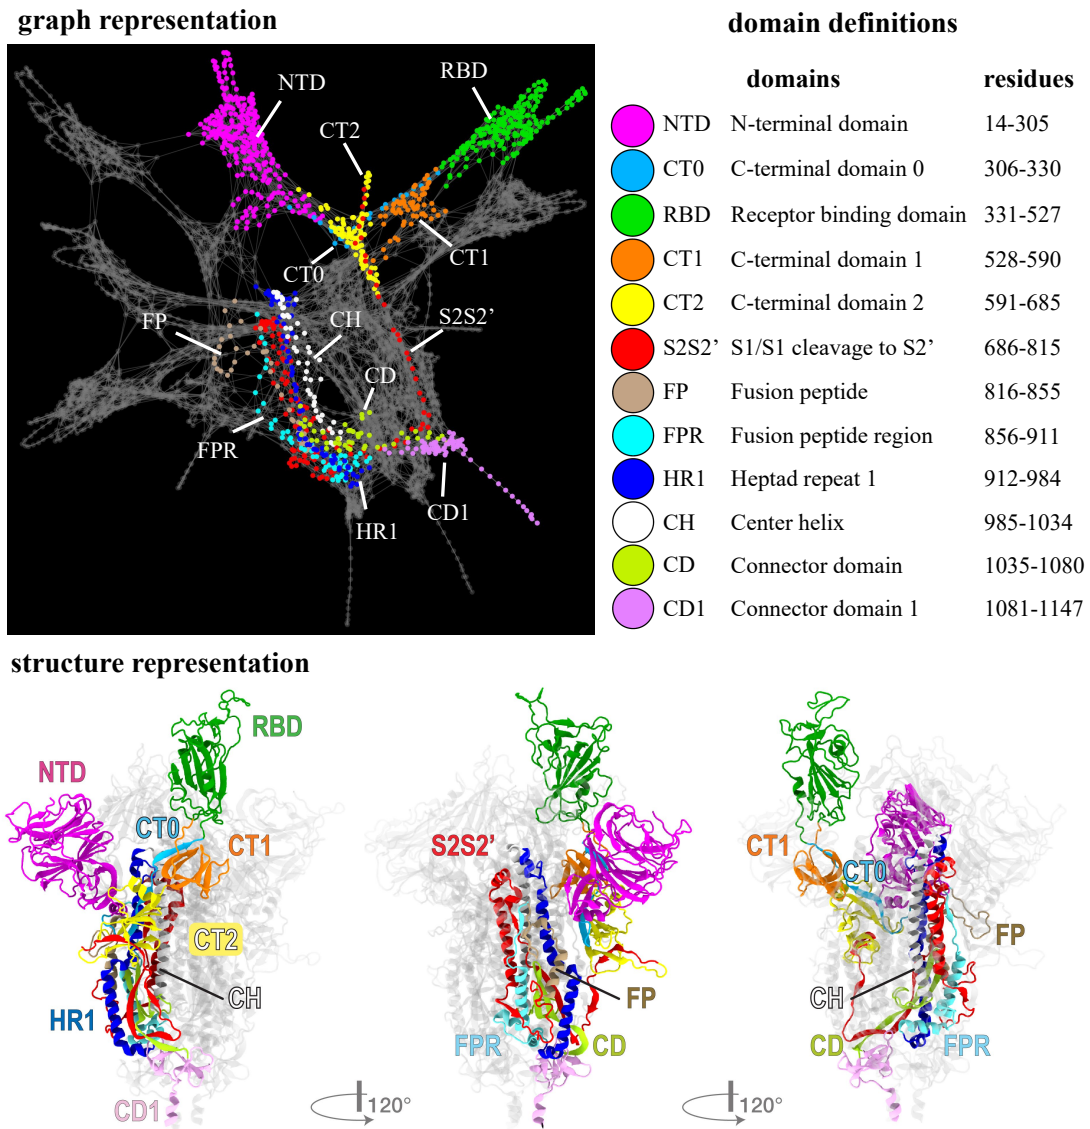

Figure 1: **Graph and structure representations of the SARS-CoV-2 Spike protein.** Top left and bottom panels illustrate the graph and graph representations, respectively, of the Spike protein divided into pre-assigned protomer domains (colored regions/nodes). In the top right panel, we provide the full domain names, the domain abbreviations, and the residues that comprise them.

52 From its discovery in November 2019 and throughout 2020, COVID-19, like other coronaviruses, has  
53 shown a slow rate of immunologically relevant variant accumulation, even after experiencing a world-  
54 wide spread, as compared to some other viruses such as influenza and HIV-1 [12, 13]. Indeed, the  
55 most notable evolutionary event has been on the Spike protein itself: a single amino acid substitu-  
56 tion in residue 614 where an aspartic acid (D) was replaced by a glycine (G) [14]. This variant (G  
57 form) emerged at a significant level in early March of 2020 and quickly became the dominant form of  
58 the virus, holding an enhanced infection capability over the original (D form) [12, 14–17], by virtue  
59 of its greater RBD-open ACE2 binding capable conformation [17, 18]. Another potential factor im-  
60 pacting the infectivity of the virus is the higher rate and efficiency of furin cleavage found in the G  
61 form [19]. The Furin Cleavage Site (FCS) loop is an advantage acquired by the CoV-2 Spike over  
62 its CoV-1 predecessor, wherein furin-mediated S1-S2 proteolytic cleavage and conformational changes  
63 lead to more efficient downstream infectivity [20], and mutations near the furin cleavage sites may be  
64 contributing to enhanced infectivity of emerging variants [21, 22]. Most recently, several new and po-  
65 tentially significant variants have emerged, bringing with them additional challenges for vaccines and  
66 immunotherapies [23, 24]. Among them, recurrent deletions and accelerated substitution rates in the  
67 NTD drive antigenic and adaptive evolution and grant resistance to neutralizing antibodies [25, 26].  
68 Most known NTD-specific neutralizing monoclonal antibodies (mAbs) target a specific region of the  
69 NTD, that coincides with the occurrence of these high-frequency mutations. This supersite that has  
70 emerged is composed of residues 14-20 (loop), 140-158 ( $\beta$ -hairpin), and 245-264 (loop) [27, 28]. Though  
71 this mechanism of antibody escape has been minimized with NTD-binding cocktails of antibodies [29],  
72 it is still not quantitatively understood why the NTD is a crucial target for these binding antibodies  
73 and its relevance within the protein at large.

74  
75 The functioning of the Spike protein is largely driven by allostery, with coupled dynamics between crit-  
76 ical moving parts such as the NTD, RBD, FCS, and D614G-loop modulating its overall behavior. The  
77 manner by which these domains effectively communicate over long distances, however, remains unan-  
78 swered. Here we implement a mathematical framework that sheds light on these puzzling questions  
79 and complements the current body of knowledge on the virus. We use extensive all-atom molecular  
80 dynamics simulations of the D and G forms in their dominant conformation states (all-RBD down  
81 and 1-RBD up) [11], to construct a weighted graph representation of the protein residues from the  
82 contact and correlation matrices of these simulations. With this framework, we quantitatively de-  
83 scribe the dynamical relationships between different residues [30] and how they are impacted by the  
84 D614G substitution, as well as the inter-chain communication between either the three symmetrically  
85 down protomers, or the up-protomer with the left and right chains on either side (U, L, R-protomers  
86 respectively).

87  
88 Using graph theory techniques, we identify the critical residues (nodes of the graph) and domains and  
89 assess their roles in communication and control of protein allostery. By engaging with these critical  
90 residues, we predict that it could drastically alter essential long-range molecular interactions and sta-  
91 bility. Our analysis shows that these key residues tend not to overlap with those where most of the  
92 mutation/deletions occur. We hypothesize that the high mutation rate in regions such as the NTD  
93 occurs as a consequence of fitness pressures towards immune escape, while the lack of mutation in  
94 the key residues identified by the graph theory analysis demonstrates their likely importance for pro-  
95 tein function. For calculations involving the RBD, we focus on the subset of residues that bind to the  
96 ACE2 receptor (residues 438-508) and hence are the most relevant for infectivity, the receptor-binding-  
97 motif (RBM). In specific, we find: (1) The communication structure in the G-form is more resilient  
98 to disruption than that of the D-form; (2) the G-form promotes efficient allosteric pathways to the  
99 RBM from distant regions such as the furin cleavage sites, at the cost of heightened vulnerability to  
100 RBD-binding antibodies compared to the D form; (3) enhanced symmetry in the use of hinge residues  
101 to communicate residue 614 with the receptor-binding-motif (RBM) in the one-up conformation of  
102 the G form over that of the D form, establishing more stable allosteric communication and robust-  
103 ness to eventual hinge mutations; (4) network measurements based on communication efficiency and  
104 node-to-node influence determine that key residues, most of them belonging to the NTD, are critically

105 positioned and hierarchically connected to exert wide-reaching control of the protein at large; and (5)  
106 a specific examination of the NTD residues that are altered in the Delta variant, reveals that these  
107 residues are more efficient at impacting the full protein than the residues of the NTD supersite.

## 108 RESULTS

109 We begin with the network characterization of the Spike protein. First, we address the differences  
110 between the closed and open conformations and how they are impacted by the D614G variant. We  
111 further illustrate the differences by looking into several aspects of the communication properties of  
112 each network, and how these differences impact infectivity and overall network stability. Due to abun-  
113 dance of theoretical and experimental data, this critical mutation serves as a solid test for the network  
114 approach. Then we move on to the importance of the functionally least understood NTD domain.  
115 Finally, we bring the network concepts to evaluate the emerging mutations and the critical sites for  
116 antibody binding. Additional network properties of the Spike protein, as well as, further details of the  
117 results presented in this section are provided in the Supplementary Material (SI).

### 119 **Graph measure uncovers the communication core of the Spike protein and demonstrates that the** 120 **D614G variant is more resilient to communication disruption**

121 The ability of a particular node or group of nodes to form a bridge between distant regions of a network  
122 is quantified by the *betweenness centrality*. Mathematically, the betweenness centrality of a node is the  
123 number of optimal pathways (geodesics) that run through it as part of connecting any other pair of  
124 nodes in the network. In the context of our graph-based analysis of the Spike, residues taking part in  
125 a greater number of “shortest pathways”—i.e. the most highly-correlated series of contacts—connecting  
126 any other two residues of the protein are identified by higher betweenness centrality. Residues with  
127 high betweenness centrality act as critical ‘hubs’ that influence many optimal pathways of protein  
128 allosteric communication. We compute the betweenness centrality for each individual residue of our  
129 four networks and assess the implications at the level of the full protein, at the level of the domains,  
130 and at the level of the individual residues.

131  
132 At the entire protein level, we find that the regions with the highest values of betweenness centrality  
133 form a closed ring about the protein, which forms the structural communication core of the whole sys-  
134 tem. Differences in the communication core between networks highlight the impact of the D614G shift  
135 in the all-down and one-up states [Fig.2(a)]. The ring straddles the equatorial plane of the Spike at the  
136 base of the NTD, extending via the CT0 to the base of the RBD. This high-centrality band of residues  
137 extends to the beta-strands at the nadir of the furin cleavage hairpin, and comprises residues of the  
138 NTD, CT0, CT1, and CT2 domains from all three protomers [Fig. S2]. This holds for both forms  
139 (D and G) and both conformations (all-down and one-up). However, we find that the communication  
140 ring in the G form is comprised of a greater fraction of residues of CT0 and a lower fraction of residues  
141 of CT2 and displays enhanced stability in the number of residues belonging to each of the regions  
142 when we compare the all-down and one-up conformations, in comparison to the D form. This core  
143 ring is crucial for communication between the three peripheral domains of the Spike - the NTD, RBD,  
144 and FCS (circled in black) and the central region of the protein. Interestingly, this high centrality  
145 core avoids the NTD supersite (highlighted in green in Fig. 2(a)), where many antibodies have shown  
146 particular binding preference and effectiveness [25,27,29]. The dynamics of all three domains involved  
147 in the core ring have been established to play significant roles in Spike protein function [31–33]. Our  
148 betweenness analysis therefore elucidates the allosteric linkage of these important moving parts of the  
149 Spike and demonstrates that a site of preferential antibody binding is not a site that impacts protein  
150 function.

151  
152 At the domain level, we find that CT0, despite being a small domain comprised of only 25 residues  
153 in each protomer [Fig. 1], is associated with the highest betweenness centrality overall. Indeed, it  
154 is the highest-ranking domain for both conformations of the G-form and the all-down conformation  
155 of the D-form (CT1 ranks slightly higher for the one-up D-form conformation) [Fig. 2(b)]. This  
156 domain, located at the heart of the Spike, appears to be crucial for communication between distant  
157



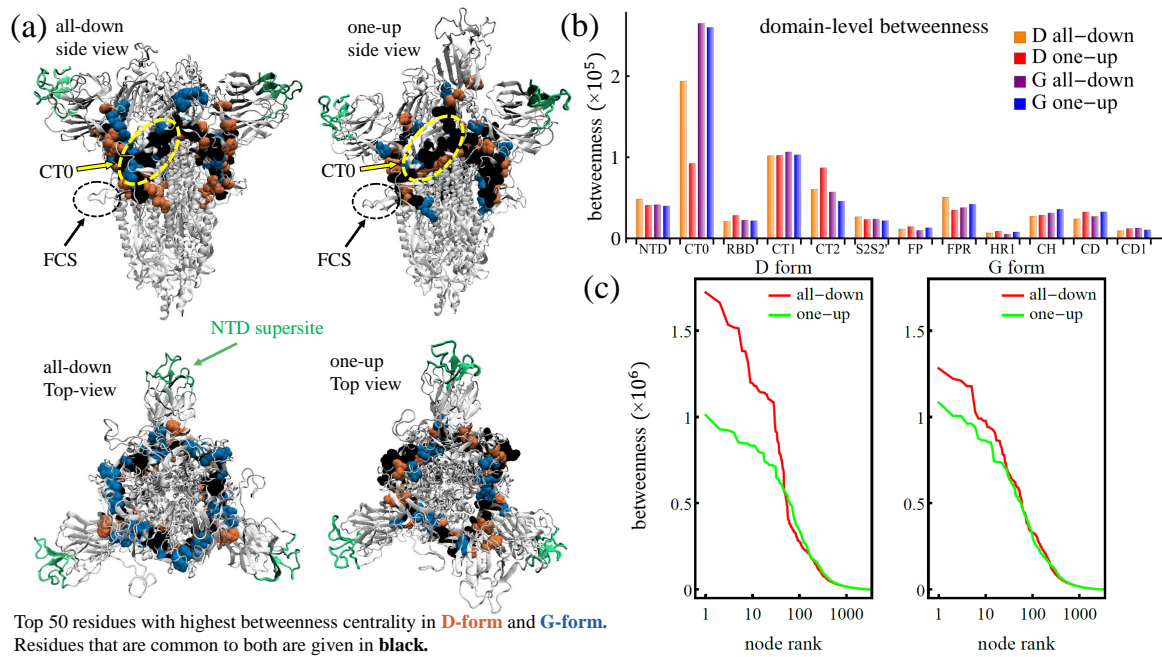

Figure 2: **Communication core of the Spike protein.** (a) SARS-CoV-2 Spike protein in the structure representation highlighting the NTD supersite (green), alongside the top-50 residues with highest betweenness centrality for the D form only (orange), the G form only (blue), and both forms (black), for the all-down (left panel) and one-up (right panel) conformations. (b) Betweenness centrality broken down by domain for the D and G form and the one-up and all-down conformations. (c) Ranked betweenness centrality for individual residues of the D form (left) and the G form (right) and the all-down (red) and one-up (green) conformations.

158 regions of the protein and hence could become a strategic target for intervention (i.e., drug target,  
 159 antibody therapy). Our findings corroborate a previous experimental cryo-EM study of the Spike  
 160 ectodomain [19] that speculated on the role of this NTD-RBD linker as a modulator of conformational  
 161 changes connecting distal domains, and we go one step farther by using the centrality measures to  
 162 quantify the relative significance of each residue in this role.

163  
 164 At the individual residue level, plotting the betweenness versus the node rank reveals that the all-down  
 165 configurations contain nodes with higher values of betweenness, while the difference in betweenness  
 166 for the two configurations is larger for the D-form than for the G-form [Fig. 2(c)]. In other words, the  
 167 structural variation the Spike protein undergoes when transitioning from the all-down to the one-up  
 168 configuration has a greater impact on its communication properties in the D-form than in the G-form.  
 169 The G-form possesses more stable patterns of communication in which key functions of the protein  
 170 should not be affected by the transition to the one-up state. This result agrees with the previously  
 171 observed greater symmetrization of the inter-domain correlations and inter-protomer contacts in the  
 172 G-form between the all-down and one-up states [11]. Moreover, from a purely networks perspective,  
 173 the large values of betweenness in the all-down configuration of the D-form compared to those in the  
 174 G-form uncover an increased vulnerability of the D-form, in which a small group of nodes are involved  
 175 in a greater portion of the communication network. Perturbation of this group of nodes (e.g., through  
 176 mutation, or binding partners) would more heavily influence the conformation of the Spike in the D  
 177 form than a similar intervention performed on the G form, since a network with a more uniform distri-  
 178 bution of betweenness centrality among its nodes tends to be more resilient to external interventions  
 179 aimed at network disruption. This finding is in agreement with experimental and structural studies  
 180 that found that the Spike protein of the D form is less stable with regards to S1 dissociation than that  
 181 of the G form [15, 16].

### 182 **The G form promotes rapid allosteric pathways to the RBD at the cost of immune vulnerability**

183 We explore the effects of the D614G variant at altering specific pathways relevant for viral infectivity  
 184 through a path length analysis. Up to date, variants of concern are characterized by a combination  
 185

186 of high transmissibility and/or immune response escape [23, 24, 26]. For example, the Delta variant,  
187 characterized by eleven modifications (two of them in the RBD) including two deletions, has shown  
188 resistance to monoclonal antibodies (mAbs) casirivimab and imdevimab, which are otherwise effective  
189 binders to the RBD able to inhibit human receptor binding [34]. Furthermore, RBD opening transition  
190 and changes in FCS are known to affect each other [18, 35]. Thus, variations in the communication  
191 properties to the RBD becomes a key question to address in order to establish the impact of mutations  
192 in the transmissibility and antibody resistance of the virus.

193  
194 To this end, we analyze the optimal paths between the furin cleavage region and the RBM [Fig. 3(a)],  
195 and between residue 614 and the RBM [Fig. S4(a)]. We employ the Floyd-Warshall algorithm to  
196 determine the most efficient route connecting any two nodes in a given network from the contact  
197 matrix and the node pair correlations. The path length between these sites is defined as the sum of  
198 the edge weights of edges lying between the end point sites. As previously mentioned, high-magnitude  
199 correlations correspond to small edge weights and hence shorter paths, whereas low-magnitude corre-  
200 lations correspond to large edge weights and hence longer paths. Chains of highly correlated residues  
201 thus form shorter (i.e., more efficient) pathways than chains with the same number of links comprised  
202 by uncorrelated residues. A computation of the optimal pathways reveals that residue 614 lies near  
203 the shortest path from the FCS to the RBM region. This highlights its relationship to the up/down  
204 protomer states. Moreover, we find that the frequent mutation sites near FCS [36] do not generally lie  
205 on the optimal pathway to the RBM. We hypothesize that these sites do not overlap with the shortest-  
206 path sites due to the fact that changing the shortest-path sites would also change the communication  
207 pathway from the RBM to the cleavage site.

208  
209 In Figure 3(b), we depict the results of assessing optimal pathways between the different source/target  
210 regions. For consistency in the comparison between the two conformational states, we use the same  
211 protocol of focusing on the cases where the target chain is the U protomer, due to the up and down  
212 state variation of our simulations. Thus, each panel in Fig. 3(b) presents three pairs of results for each  
213 of the source/target options: from protomer U to protomer U (UU), from protomer L to protomer  
214 U (LU), and from protomer R to protomer U (RU). For the RBM and the furin regions, which are  
215 comprised of several residues, we compute the path lengths for all of the residues in the region and  
216 report the average distances alongside their fluctuations (error bar in the charts). Our results show  
217 that the G form experiences a larger disparity in the path lengths when comparing the all-down with  
218 the one-up conformation, where the all-down path length tends to be shorter than the one-up. Con-  
219 versely, the D form shows smaller differences between the path lengths in these two conformations,  
220 and the all-down path lengths in the D form are generally longer than those of the G form [Fig. S4].  
221 A rapid allosteric pathway to the RBM in the all-down conformation in principle reduces the effective  
222 RBD transition time to the up conformation that, in turn, enhances the overall binding effectiveness  
223 to the host receptor. The disparity tends to be enhanced in the inter-protomer pathways, of which,  
224 the counter-clockwise distances are more efficient [Fig. S4]. For most cases (five out of six), the path  
225 lengths to the RBM in the D form are longer than those of the G form. Hence, we could state that  
226 one of the mechanisms through which the D614G variant increases effective viral infectivity, is by  
227 enhancing the communication structure towards RBD while in the down conformation. Similarly, the  
228 length of the pathways in the up-conformation could be associated to the effective time elapsed to  
229 transition back to the down conformation, which becomes secondary within a viral infectivity context.  
230 However, a slow up-to-down transition of the RBD can be threatening to the virus as it presents an  
231 opportunity to bind to harmful agents such as antibodies. Therefore, our finding suggests that the  
232 G form enjoys viral infectivity advantages over the D form at the cost of a higher RBD vulnerability  
233 to antibodies. Additional details of these pathways and full list of residues involved are provided in  
234 Tables S4-S5 in the SI.

235

### 236 **Communication through the RBD hinge residues is more balanced in the G-form**

237 The RBD is a globular domain that transitions between up ('open') and down ('closed') conformations  
238 (Fig. 1). Only in the open conformation is the ACE2 binding site appreciably exposed. This dynamic

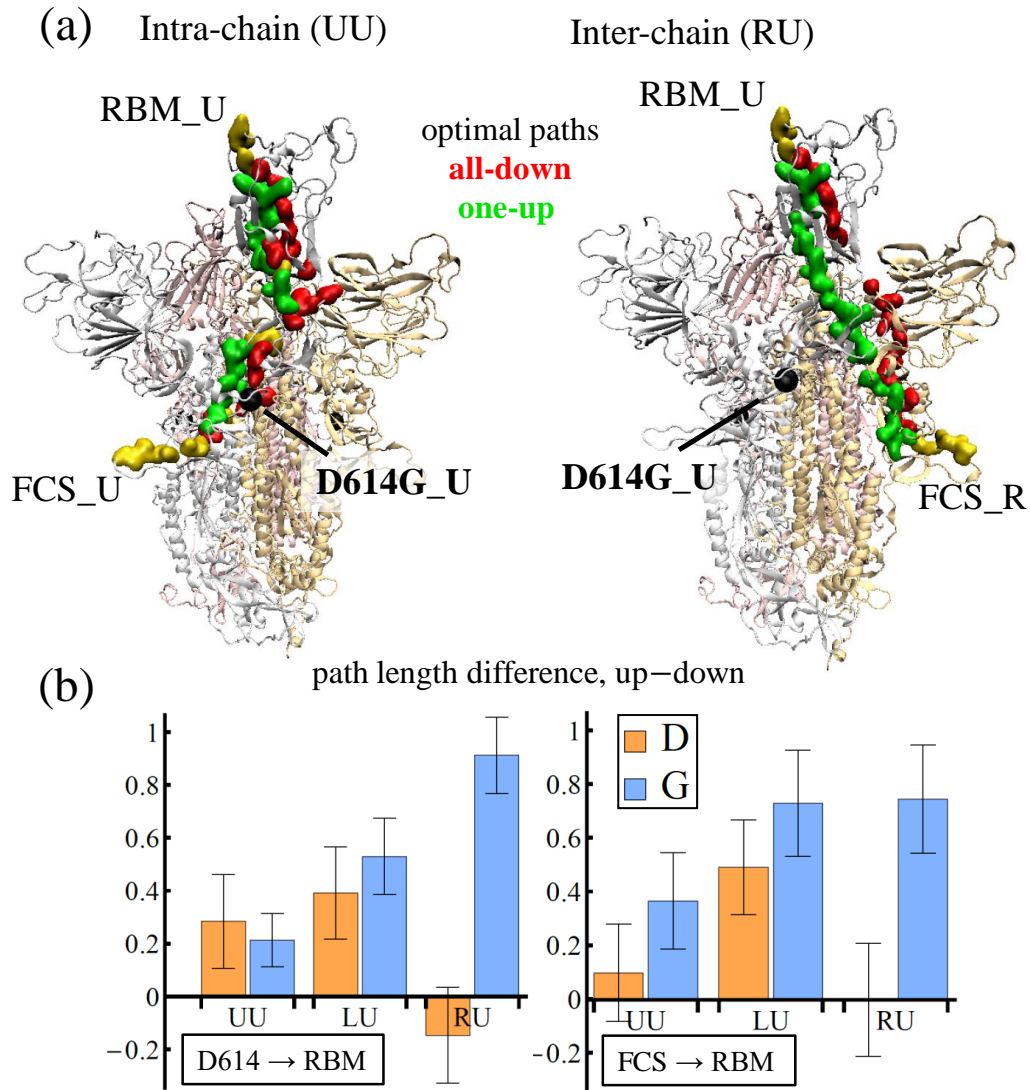

Figure 3: **Optimal pathways to RBM from residue 614 and furin cleavage sites.**(a) SARS-CoV-2 Spike protein in the structure representation highlighting the optimal intra-chain (left panel) and inter-chain (right panel) pathways from the furin cleavage (residue 685) to the RBM region (residue 501) for the all-down only (red), one-up only (green), and both conformations (yellow) in the G form. (b) Difference in the path lengths between the one-up and the all-down conformations of the D (orange) and G form (blue), for two sets of source/target regions: between residue 614 and the RBM (left panel) and between the furin cleavage site and the RBM (right panel). For all cases, the target region is specified at the protomer U, and the source is either protomer: from U to U (UU), from L to U (LU), and from R to U (RU).

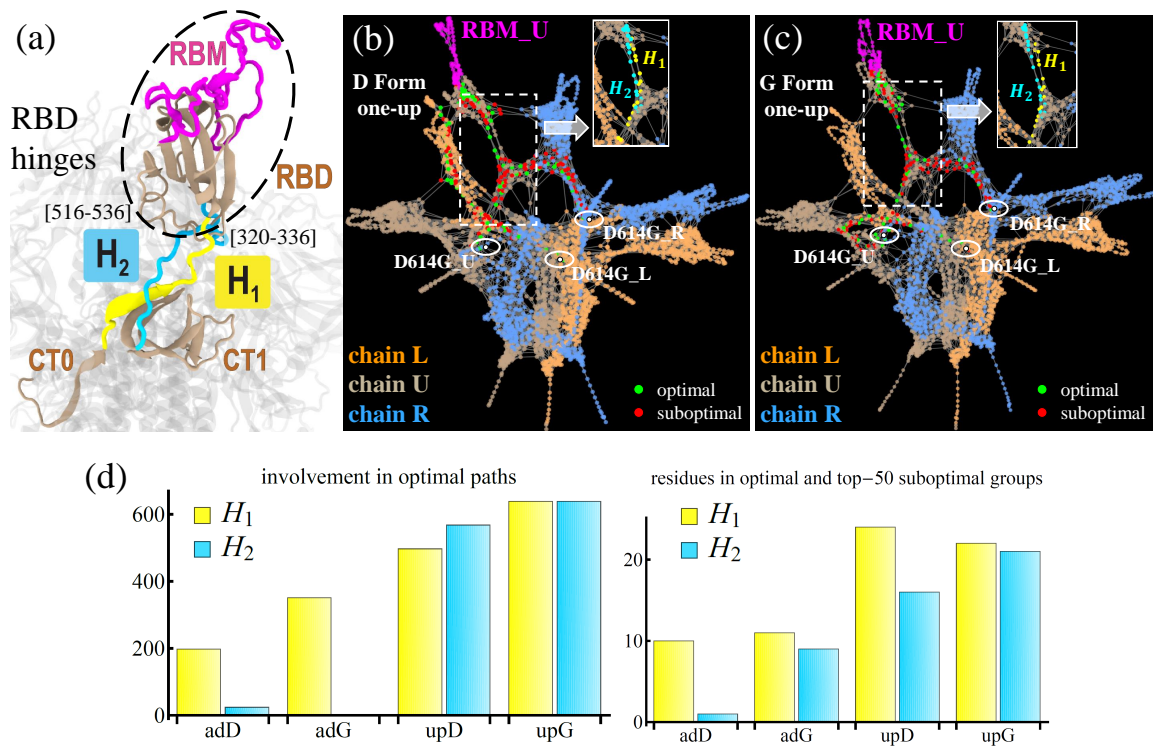

Figure 4: **Hinge preferences in the D and G forms of the Spike protein.** (a) Structural representation of a portion of the SARS-CoV-2 Spike protein highlighting the RBD hinges ( $H_1$  and  $H_2$ ) for the U protomer. (b-c) Spike protein in full in the graph representation for the one-up conformation of the D (b) and G (c) forms. Each network displays the protomers (chain) in a different color and highlights the RBM of the U protomer (magenta), as well as the residue 614 for each protomer (white nodes). Nodes comprising the optimal paths from 614 to RBM\_U are colored in green, and the top-50 suboptimal nodes are shown in red (see text for the definition). Insets define the location of the hinge residues  $H_1$  (yellow) and  $H_2$  (cyan) in the network. (d) Number of times residues from  $H_1$  (yellow) and  $H_2$  (cyan) take part on the shortest paths from 614 to RBM\_U (left), and number of hinge residues that comprise the optimal paths and top-50 suboptimal nodes connecting residue 614 to RBM\_U (right).

239 transition occurs via reorganization of two loops at the N-terminal and C-terminal bases of the RBD  
 240 that act as “hinges” about which the RBD swivels. These two hinges  $H_1$  (residues 320-336) and  
 241 ( $H_2$  (residues 516-536) [Fig. 4(a)] are the only direct (covalently-linked) structural connections between  
 242 the RBD and the rest of the Spike [5, 7] and therefore play a direct role in the regulation of the up  
 243 and down movements of the RBD. Therefore, the perturbations at the distance stalk of the Spike,  
 244 including the D614G shift, that have been shown to affect the gating mechanism of the RBD, must in  
 245 some way communicate via the hinges [17, 18].

246  
 247 To understand how communication occurs between the stalk to the Spike, we explore the role of  $H_1$   
 248 and  $H_2$  in connecting residue 614 to the subset of residues of the RBD that binds to the ACE2, RBM  
 249 (residues 438-508), by computing the shortest network pathways. We quantify the involvement of  
 250 each of the hinge residues in these pathways in two complementary manners. In method (i) we count,  
 251 for all RBM residues, the number of times a particular hinge residue is part of a shortest pathway  
 252 between that residue and 614. In method (ii), we count the number of hinge residues that belong to  
 253 either the group of residues comprising the shortest paths or an additional group comprising the top-50  
 254 suboptimal residues. Adding the top-50 suboptimal residues accounts for neighboring residues to the  
 255 shortest pathway that could play a key role by assisting optimal residues in their communication tasks  
 256 by providing alternatives routes to the RBM. These suboptimal residues are identified by comparing  
 257 the direct (i.e., optimal) path from 614 and RBM with an indirect (i.e., suboptimal) pathway that  
 258 goes through an additional third node, which does not belong to the optimal path. The difference in  
 259 the length of these pathways provides a measure of how well this third node connects 614 and RBM  
 260 through a suboptimal path; the smaller the path length difference, the higher the third node ranks



261 within the suboptimal group. Thus, method (ii) identifies and quantifies the number of hinge residues  
262 that take part of optimal pathways and their surroundings (i.e., suboptimal pathways), and method  
263 (i) quantifies the frequency with which these residues are traversed in the optimal pathways.

264  
265 Since the up conformation of the RBD is capable of binding ACE2, the event that leads to viral entry  
266 and later infection, we focus on the paths from residue 614 to RBM in the U-protomer [Fig. 4(b-c)]. In  
267 method (i), we examine a total of 852 paths, taking into account the relevant source/target combina-  
268 tions for the three protomers in all four protein configurations: D-form/G-form and all-down/one-up  
269 conformations. We find that in the all-down conformation there is a strong preference for using  $H_1$   
270 over  $H_2$  irrespective of the D614G mutation. When the suboptimal residues are included, we observed  
271 that in the G form alone, the  $H_2$  residues began to participate in communication [Fig. 4(c)]. The  
272 D-form is found to avoid the use of the hinges in some of its inter-protomer paths. This is the case  
273 of  $R \rightarrow U$  in the all-down conformation, and  $L \rightarrow U$  in the one-up conformation [Fig. 4(b)]. The high  
274 inter-protomer correlations promote the formation of these low-cost alternative routes to RBM. Ad-  
275 ditional details of these calculations are provided in the SI.

276  
277 The one-up conformation is characterized by an increase in the usage of  $H_2$  residues when compared  
278 to that in the all-down case. We find that the G form is able to use both hinges almost equally and at  
279 comparable frequencies. This is in contrast with the D form, where we find the use of a larger number  
280 of residues at a smaller frequency for  $H_1$  and a smaller number of  $H_2$  residues at larger frequencies [Fig.  
281 4(d)]. Therefore, our findings show that, in the one-up state, the G form attains a greater balance  
282 in the usage of the hinge residues than the D form. With the G-form Spike known to have a higher  
283 opening probability [11, 17, 37], this greater balance establishes a more stable allosteric communication  
284 pathway, utilizing both the hinges and being more robust to eventual hinge mutations that may come  
285 up.

### 286 287 **NTD and CT are the communication hubs of the Spike protein**

288 As its name suggests, closeness centrality measures the proximity of a particular node to the rest of  
289 the nodes in the network. Mathematically, it is defined as the inverse of the average path length be-  
290 tween a particular node and all of the remaining nodes in the network. Higher values of this measure  
291 are associated with network-scale communication efficiency. This quantity answers the question of  
292 which nodes are most efficient at transmitting a signal (e.g., warning, cue, infection) to the rest of the  
293 network. In the context of the Spike protein, residues with a moderate to high closeness centrality are  
294 initiators of effective allosteric communication to able to efficiently reach every other residue of the  
295 protein.

296  
297 Computing this centrality measure for each of our four graphs unveiled some commonalities, as well  
298 as, contrasting behavior at the protein, domain, and residue levels. At the protein level, in all four net-  
299 works (D- and G-form, RBD-up and down), the S1 terminal dominates S2 in terms of high centrality  
300 [Fig. 5(a)]. Analyzing the residues that are within the top 33% in closeness, we find that a minimum  
301 of 98.76% and a maximum of 99.64% of them belong to S1, depending on the network. Though this  
302 is not necessarily surprising given the key role of the S1 subunit in regulating the receptor recog-  
303 nition/binding process, the finding provides a good check that validates the approach and provides  
304 additional support for our other findings. At the domain level, we find that the NTD, CT0, CT1, and  
305 CT2 regions score the highest in closeness centrality. This indicates that these domains are capable  
306 of drastically and efficiently impacting the entire protein. In the context of antibody neutralization,  
307 the virus is expected to mutate at regions where antibodies bind, for immune escape [26]. But if an  
308 antibody binds to the NTD, even if it is not exactly binding to the highest centrality residues, it will  
309 affect the NTD dynamics, which are highly correlated with the RBD dynamics, and therefore the  
310 antibodies are targeting areas of the protein that are highly relevant for protein function, possibly the  
311 up/down RBD transition.

312  
313 Comparing the closeness centrality of the different networks, a general trend is found where the close-

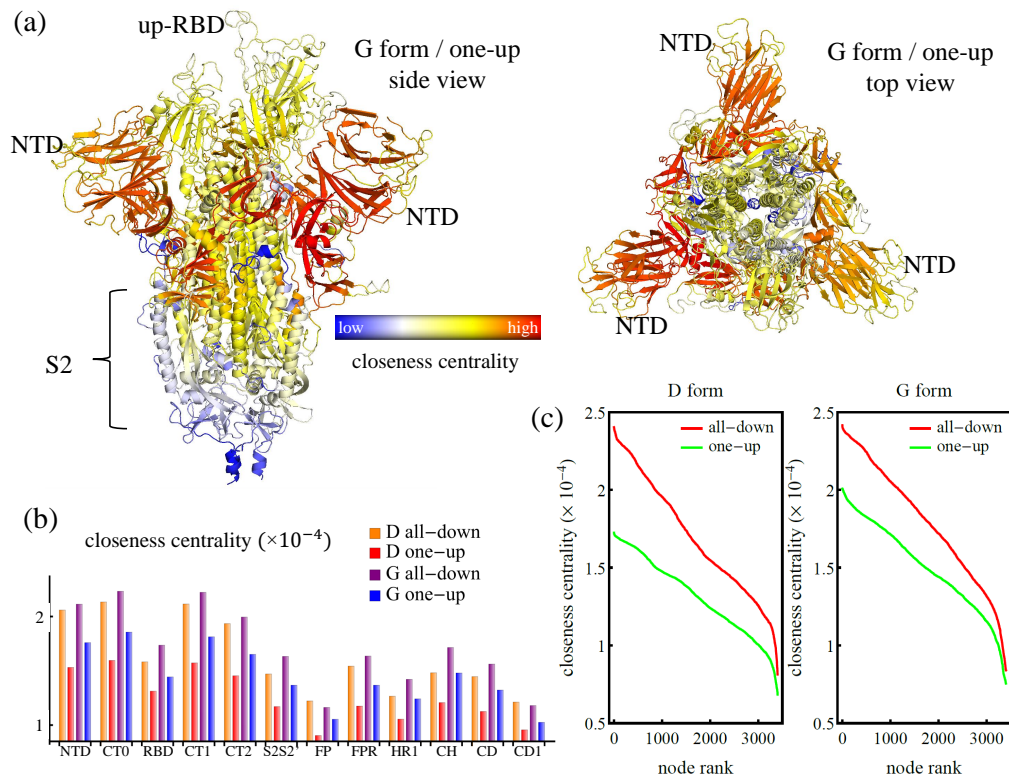

Figure 5: **Closeness centrality highlights the NTD, CT0, CT1, and CT2 domains.** (a) Structure representation of the SARS-CoV-2 Spike protein in the one-up conformation of the G forms colored by the closeness centrality. This measure is also presented broken down by protein region (b) and by individual residues ranked from highest to lowest (c), for the D and the G form, and for the all-down and the one-up conformations.

314 ness for the all-down conformation is higher than that of the one-up, and the closeness of the G-form  
 315 is higher than that of the D form [Fig. 5(b)]. This statement also holds at the level of the individual  
 316 residues [Fig. 5(c)]. A ranking of the nodes shows a smooth behavior in which, as opposed to the  
 317 betweenness centrality of the top residues, the difference in closeness for consecutive ranked residues  
 318 does not change drastically, and the overall trend of the closeness values of ranked residues agree with  
 319 the domain-level trend. This tendency is explained by looking into the pair correlations of linked  
 320 residues (i.e., edge weights) for the different protein systems. We find that the average pair correlation  
 321 between contact residues for the all-down conformation in both, the D- and the G-form, is always  
 322 higher than that of the one-up conformation, which in turn, makes the average path length shorter in  
 323 the all-down conformation [Table S1]. Moreover, we find that the G-form has shorter path lengths, on  
 324 average, than the D-form, which makes the Spike of the D614G variant more efficient at establishing  
 325 effective allosteric communication pathways than that of the wild type.

326

### 327 **NTD is a central influence with a far-reaching role in protein functionality**

328 While centralities of communication, such as betweenness and closeness, are focused on shortest paths  
 329 analysis, centralities of influence, such as degree and eigenvector, take into account additional net-  
 330 work features providing complementary information about the relevance of specific nodes at the local  
 331 level as well as the network at large. Degree centrality quantifies the strength of the connections of a  
 332 given node. For unweighted networks, this is simply the number of edges a particular node has. For  
 333 weighted networks, each edge is scaled by its respective weight, and the sum of these weights is known  
 334 as weighted degree or vertex strength [38]. Since it includes the nearest neighbors only, vertex strength  
 335 is considered a measure of influence at the local level. An extension of this measure is eigenvector  
 336 centrality, which computes the influence of a particular node based on the influence of its neighbors.  
 337 Thus, the centrality score of a given node  $j$  takes into account the score of its neighbors, which in turn,  
 338 take into account the scores of their neighbors, which are the second degree neighbors of node  $j$ , and

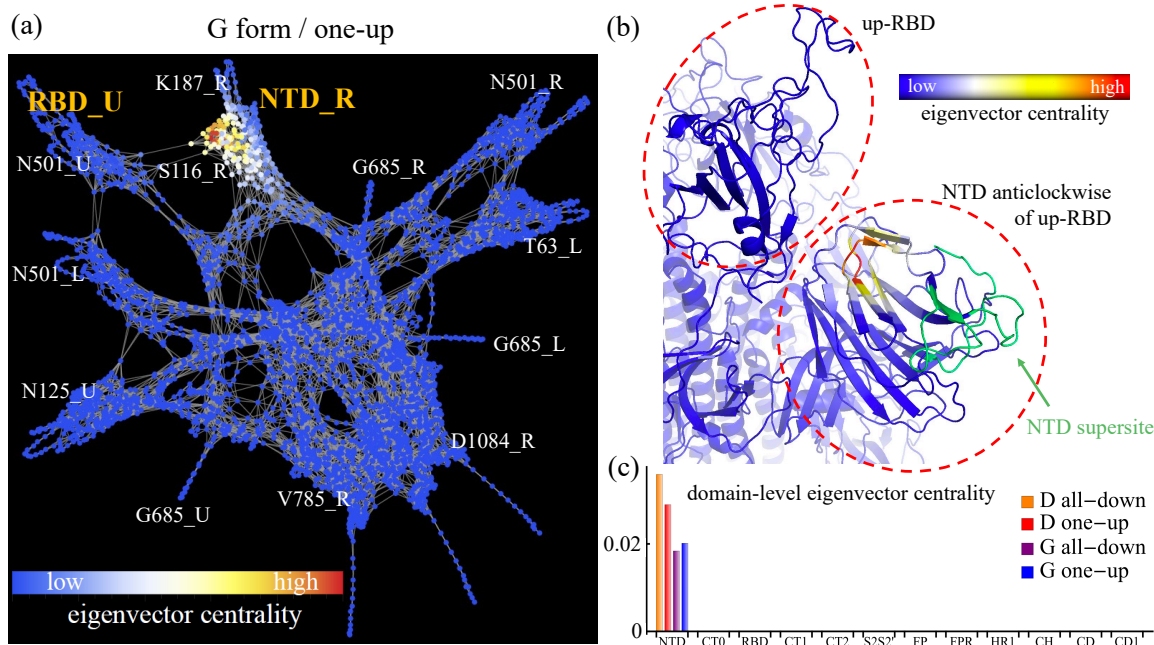

Figure 6: **Eigenvector centrality highlights dominant role of NTD.** (a) Graph representation of the SARS-CoV-2 Spike protein in the one-up conformation of the G form colored by individual node eigenvector centrality. (b) Structure close-up for the NTD and neighboring RBD region with eigenvector centrality highlighted by residue. (c) Domain-level eigenvector centrality for the D and the G forms, and for the all-down and the one-up conformations.

339 so on. Therefore, this centrality intrinsically includes interactions with higher degree of neighbors, and  
 340 hence quantifies the global influence of a given node. Mathematically, the eigenvector centrality of the  
 341 node  $j$  is the  $j$ -th entry of the adjacency matrix eigenvector associated with the largest eigenvalue.  
 342 In contrast to optimal paths analysis, in which edge weights indicate path lengths and therefore the  
 343 smaller the weight the higher the importance of the edge, in influence centrality measures, the edge  
 344 weights directly indicate importance. Therefore we employ an edge weighting for influence centrality  
 345 that monotonically increases with the correlation between two residues (see Materials and Methods)  
 346 and which is the inverse of the weight used for optimal communication paths calculations [39].

347  
 348 Computing the vertex strength and the eigenvector centrality of the graph representation of the Spike  
 349 protein reveals that the NTD dominates in terms of both. At the domain level, a high vertex strength  
 350 indicates that strong correlations between nearest neighbors in the NTD are common across the domain  
 351 [Fig. S3]. This result is surprising: since the NTD is the largest domain of the Spike, containing  
 352 292 residues, one might expect a high number of pairs with lower correlations would drive down the  
 353 average node strength. Other domains associated with strong intra-domain interactions are CT1,  
 354 RBD, and CT0. In terms of eigenvector centrality, the NTD far outstrips any of the other domains in  
 355 the protein, which highlights its hierarchical importance for the network at large [Fig. 6(a-c)]. This  
 356 finding demonstrates in a quantitative manner that the critical residues in this domain, highlighted  
 357 by the eigenvector centrality, exert wide-reaching influence to the protein at large, and that alteration  
 358 in these nodes will affect the entire network. Interestingly, the residues with the highest eigenvector  
 359 centrality in the G form are in close contact with the up-RBD but are not located within the NTD  
 360 supersite [Fig. 6(a-b)]. It is likely that the experimentally-observed comparatively rapid mutation in  
 361 the supersite occurs as a consequence of fitness pressures towards immune escape, while the lack of  
 362 mutation in the nearby high eigenvector centrality residues further underscores their importance for  
 363 protein function.

364  
 365 **NTD sites altered by the Delta variant impact the protein more efficiently than do the NTD supersite**  
 366 Nine months after the emergence of the D614G variant in March of 2020, additional variants gradually  
 367 emerged in several countries at different points in time [40–42]. Among the variants observed through

368 July of 2021, the Delta variant (B.1.617.2), which originated in India [43], has received special attention  
369 due its enhanced infectivity, its ability to bypass antibodies [44], and to quickly become the dominant  
370 form of the virus, in a manner reminiscent of the previous year's emergence of the D614G variant.  
371 Estimated proportions indicate that the Delta variant accounts for 57.6% of new infections in the US  
372 as of July 2021 and 98% of sequenced viruses circulating in the UK up to June 30, 2021 [45,46]. The  
373 Delta variant possesses, in addition the D614G amino acid shift, three modifications and two deletions  
374 in the NTD supersite (T19R, G142D, R158G, and E156, E157, respectively), two modifications in the  
375 RBM (L452R, T478K), one modification near the FCS (P681R), and two additional modifications:  
376 one in the NTD (T95I) and another in the Heptad Repeat 1 (HR1) (D950N). The location of these  
377 sites in the Spike protein are shown in Fig. 7(a-b).

378

379 We characterize the sites modified by the Delta variant with our network analysis, particularly the  
380 centrality measures of betweenness, closeness, and eigenvector. In terms of betweenness and eigenvector,  
381 we find that these residues rank very low for both conformations of the RBD, pointing to a scarce  
382 ability to bridge together or exert control over distant residues. Among the sites studied, the most  
383 relevant residue for communication (i.e., betweenness) is L452, through which runs a small fraction  
384 (5%) of the optimal communication pathways, in comparison to the highest ranked residue of the  
385 protein (V320 for all-down and V597 for one-up). As a background, residue 452 was extensively char-  
386 acterized as part of the California variant, and it impacted infectivity and resistance [47]. Deletions  
387 in this variant account for nearly 0.5% of the number of pathways carried by these highest ranked  
388 residues. Similar values are found when we examine the betweenness centrality of the modification at  
389 the FCS, and when we look at the eigenvector centrality of all the mutations [Fig. S5]. Therefore,  
390 modification/deletion of these residues are not expected to severely affect the protein in connectivity  
391 or large-scale control.

392

393 By contrast, examining the closeness centrality of these critical residues modified by the Delta variant,  
394 we find that those of the NTD rank high in their centrality measures (see Fig. 7(c) and Fig S6(a))  
395 compared to the rest of the residues in the Spike. This means that these residues are good at initiating  
396 efficient pathways capable of reaching every region of the protein. They possess little capacity to serve  
397 as communication bridges (i.e., low betweenness), but they possess outstanding capacity to serve as  
398 pathway initiators (i.e., high closeness). These NTD residues effectively reach every other residue  
399 in the protein, with efficiencies ranging between 80-95% with respect to the highest ranked residue  
400 in closeness centrality (V597 for all-down, and K310 for one-up). Figure 7(d) compares the average  
401 closeness centrality for these sites with that of the residues comprising the NTD supersite (residues  
402 14-20, 140-158, 242-264). We find that the average closeness of the NTD residues modified/deleted in  
403 the Delta variant is higher than the average closeness of the NTD supersite overall.

404

405 Our analysis provides a quantitative argument for why these critical sites are being modified/deleted  
406 in the Delta variant: changing residues with low betweenness does little to hinder the overall allosteric  
407 dynamics of the protein, but changing residues with high closeness could impact antibody binding.  
408 Modifications in the sites G142 and R158 in specific have already been shown to be directly associated  
409 to mAbs neutralization escape [27]. Thus, our results suggest that the closeness centrality may be  
410 used as a quantitative measure to determine critical residues in the Spike protein with the potential  
411 of serving as effective epitopes to neutralize the protein.

412

## 413 DISCUSSION

414 The use of graph-derived approaches from MD simulations has been critical in the context of decipher-  
415 ing complex molecular interactions and their roles in regulating cellular processes [30,48–50]. Many of  
416 these efforts have focused on the identification of the critical residues that facilitate effective allosteric  
417 interactions, how they are impacted by different conformational states, and how their modification  
418 could affect communication pathways [30]. It is thus an approach capable of guiding efforts aimed  
419 at the disruption of coordinated motion between distant and important functional regions in specific  
420 proteins.



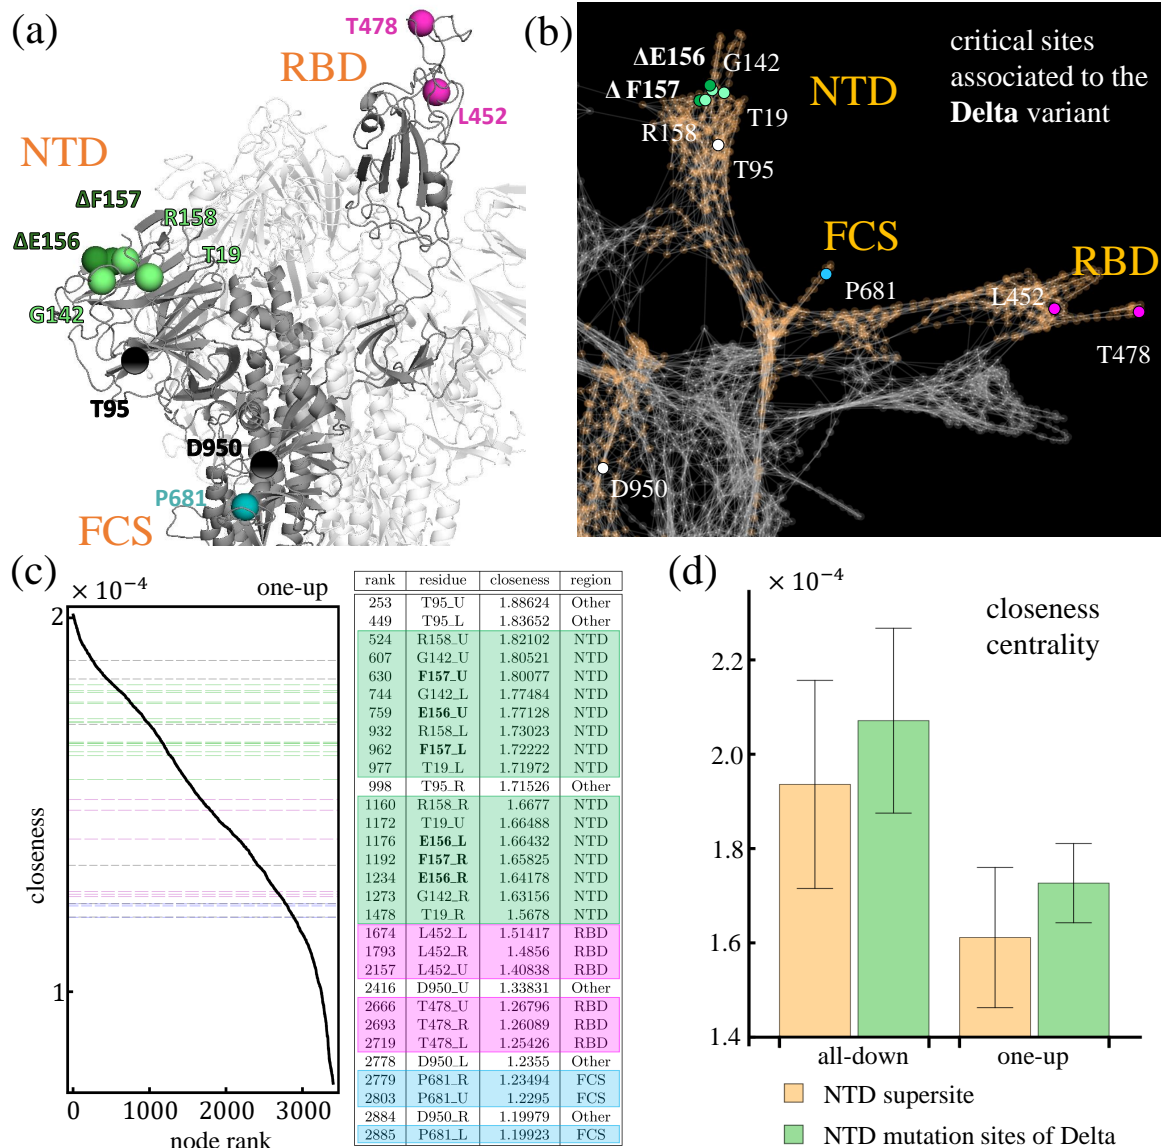

Figure 7: **Relevance of sites modified/deleted by the Delta variant.** (a) Structural representation of the SARS-CoV-2 Spike protein in the one-up conformation of the G-form highlighting the residues altered in the Delta variant. Deletions are marked in bold font and the  $\Delta$  symbol. (b) Analogous to (a) but in the graph representation of the Spike protein. (c) Left panel shows the closeness centrality of individual residues ranked from highest to lowest in the one-up conformation of the Spike protein. The horizontal grid lines mark the values of closeness associated to the residues modified/deleted by the Delta variant. The colors match the table in the right panel, and shows detailed information concerning the individual ranking position, the identity of the residue (bold font indicates deletions), and the value of closeness in units of  $10^{-4}$ . (d) Average closeness centrality and fluctuations (error bars) of the NTD mutation sites of the Delta variant compared to that of the NTD supersite for the all-down and the one-up conformation.

421

422 In this article, we have implemented an approach of this nature to identify and analyze the critical  
423 residues pertaining to communication efficiency and wide-reaching control in the SARS-CoV-2 Spike  
424 protein. We studied a total of 20  $\mu$ s of all-atom MD simulations of the full protein trimer in the two  
425 widely-observed dominant conformations of the wild type as well as the dominant D614G variant. Our  
426 results are consistent with previous empirical and computational findings pertaining to the enhanced  
427 infectivity of the virus [12, 14, 16], the greater vulnerability to RBD-binding antibodies [17, 51], and  
428 the increased stability of the Spike protein, as a result of the D614G mutation [15, 16].

429

430 Long distance interactions and linkages in proteins are challenging to capture experimentally. For  
431 example, the mutational perturbation from D to G at position 614 is known to increase the occurrence  
432 of open Spike conformation [52] and enhance protease cleavage at FCS [53], but the exact mechanism  
433 of such information transfer has not been determined. Our computational graph approach has elu-  
434 cidated optimal pathways by which such distant sites of the Spike can communicate with each other  
435 and ultimately lead to concerted dynamics and allosteric modulations. Moreover, previous studies  
436 have highlighted the importance of hydrogen-bonds and structural reorganization of the RBD linkers  
437 acting as hinges [53, 54], and in this study we have established how critical communication through  
438 these hinges is more balanced in the D614G variant.

439

440 While some previous studies have implemented similar network-based approaches to on relatively  
441 shorter simulations with the aim of identifying overall subdomains and hubs in the Spike [55–57], our  
442 analysis provides detailed and new insights into the communication structure and the control cores  
443 of the protein at large. We identify a critical communication ring connecting peripheral regions of  
444 the protein, such as the NTD supersite, the up-RBD, and the furin cleavage sites, to each other as  
445 well as to the core of the protein, where crucial processes take place upon host receptor binding (e.g.  
446 membrane fusion). The structural ring is comprised of residues of the NTD, CT0, CT1, and CT2 do-  
447 mains. These regions also showed a remarkable ability to impact the entire network, where pathways  
448 initiated in these regions are able to reach every corner of the protein more efficiently. This provides  
449 a quantitative interpretation as to why there is a preference of some mAbs to bind to regions such  
450 as the NTD, and highlights the CT0, CT1, and CT2 domains as potential targets for functionality  
451 disruption and protein inhibition. Equally important, regions of the NTD were also highlighted by the  
452 eigenvector centrality, which is a control measure. The functional region found by our analysis does  
453 not overlap with the NTD supersite, or more generally, with high-frequency mutable residues [Table  
454 S6], suggesting that substitution/deletion events tend to avoid sites that are relevant for protein func-  
455 tionality. The dominant region is adjacent and in contact with the up-RBD pointing to a potential  
456 role of the NTD at facilitating RBD binding or initial virus attachment to the host-cell surface via  
457 recognition of specific sugar molecules, or possibly aiding the prefusion-to-postfusion transition, as  
458 found in other coronaviruses [58–60].

459

460 A specific examination of the NTD residues modified/deleted by the Delta variant according with  
461 these graph theory techniques, reveals that these critical residues are associated with an on-average  
462 greater closeness centrality than those of the NTD supersite, providing a quantitative explanation as  
463 to why these particular residues are been targeted for mutation, which adds to the factor associated  
464 to antibody resistance. Our analysis did not give a clear signal in the centrality measures associated  
465 to the modifications in the RBD of the Delta variant [Fig. S6]. However, examining the closeness  
466 centrality of the NTD residues modified/deleted in the Alpha, Beta, and Gamma variants, and com-  
467 paring them with the closeness of the NTD supersite, a similar output as Fig. 7(d) is found for these  
468 variants [Fig. S7-S8]. This indicates that critical sites of the NTD, whether for mutation and/or anti-  
469 body binding, can be characterized by their centrality values. With this in mind, we further examined  
470 the average centrality scores of all the residues in the G-form and find that a combination of low-  
471 betweenness/low-eigenvector with mid-closeness and high-exposure, captures 80.4% of the residues in  
472 the NTD supersite, as well as, 63.1% of the NTD mutation sites found in the Alpha, Beta, Gamma,  
473 and Delta variants [Fig. S9]. Finally, we inspected residues 50 and 417 from the NTD and RBD,

474 respectively, that are involved in a potential recombination event from pangolin RBD to the RBD  
475 found in SARS-CoV-2 leading to a significantly higher open conformation in CoV-2 as compared to  
476 earlier pangolin Spike [61]. While these two mutations can thus enhance the close-open transition, by  
477 virtue of local structural changes around residue 50 and reduced inter-RBD interactions at 417 [61],  
478 our network analysis indicates that the combination of relatively high closeness score and low between-  
479 ness score is maintained in this evolution as well. Specifically, residue 50 ranks in position 37 and 41  
480 for the all-down and one-up conformation, respectively, in the D614G variant for closeness centrality.  
481 Their actual centrality values equal 98% of the highest-ranking node in closeness of each conformation.  
482 In the wild-type, the values are 96.5% and 97.8% of the highest ranked residue in the all-down and  
483 one-up conformations, respectively. The ranking of residue 417 in closeness is lower than residue 50  
484 but still reaches scores within the 70% mark for all four networks. These residues rank below the 1.3%  
485 and 0.002% marks in betweenness and eigenvector centrality, respectively.

486  
487 In summary, a network approach derived from all-atom MD simulations of the wild type and dominant  
488 variant of the SARS-CoV-2 Spike protein, provides quantitative insights related to the role of specific  
489 residues and regions for critical functions such as allosteric signaling, local- and global-level control,  
490 and network-scale communication efficiency. Our calculations identify the base of the NTD and the  
491 CT0, CT1, and CT2 domains as critical targets for communication disruption, and determine that  
492 a region of the NTD, adjacent and linked to the up-RBD, is able to exert wide-reaching influence  
493 over the whole system. Finally, a specific application of the employed network techniques to the NTD  
494 residues altered by the Delta variant points to a higher effectiveness of these residues at affecting  
495 the entire protein than that of the NTD supersite. Many of our conclusions are in agreement with  
496 empirical evidence while others point the way towards significant computational-guided experiments.

## 497 MATERIALS AND METHODS

### 498 Molecular modeling and simulation

499 For this work, we constructed a network model from the residue-wise correlation matrix of a series of  
500 extensive all-atom simulations we previously reported [11]. In brief, we constructed the initial struc-  
501 tures based on experimentally-resolved Cryo-EM structures of the one-up and all-down states (PDB  
502 ID 6VXX and 6VYB). Regions—largely disordered loops—that were unresolved in these structures were  
503 built with a data-driven homology-modeling approach. Missing residues in the RBD specifically were  
504 built from an ACE2-bound RBD substructure (PDB ID 6M0J). The G-form was created from the  
505 D-form through manual mutation of residue 614, but otherwise the initial structures were identical.  
506 Atomistic molecular dynamics simulations were performed using the Gromacs software suite with the  
507 CHARMM36m force field. We ran five 1.2- $\mu$ s simulations for each of the four systems. The final  
508 1000ns of each trajectory was considered as the production set, after equilibration, for a total of 20  
509  $\mu$ s of simulation in neutral solution, using the Berendsen barostat, the particle mesh Ewald method  
510 for electrostatics and temperature coupling at 310K with a Langevin thermostat.

### 512 Graph construction

513 We use the contact matrix in combination with the cross-correlation matrix to define the edges and  
514 weights of our networks, respectively. An edge between two residues is defined when heavy atoms of  
515 each residue were at a Euclidean distance of 6Å or less for at least 75% of the analyzed simulation  
516 frames. The cross-correlation matrix is defined as:

$$517 C_{ij} = \frac{\langle \Delta \vec{r}_i(t) \cdot \Delta \vec{r}_j \rangle}{\sqrt{\langle \Delta \vec{r}_i(t) \cdot \Delta \vec{r}_i \rangle \langle \Delta \vec{r}_j(t) \cdot \Delta \vec{r}_j \rangle}}, \quad (1)$$

518 where  $\Delta \vec{r}_j(t)$  are the fluctuations of atom  $j$  with respect to its average coordinates. The weights for  
519 the communication graphs edges are defined as  $w_{ij} = -\log |C_{ij}|$  [30]. We use this definition of weights  
520 for calculations based on shortest paths analysis (e.g., betweenness and closeness centralities), while  
521 its inverse for control/influence analysis [39] (e.g. degree and eigenvector centralities).

### 522 Definitions of network measures

523 In graph theory, centrality measures quantify the importance of a particular node within the network

525 at large [62]. Since the importance can be interpreted in several different ways, there are different  
526 types of centrality measures according to specific criteria. In undirected networks, the most employed  
527 measures are degree, eigenvector, closeness, and betweenness centrality.

528

529 *Degree centrality* quantifies the number of edges a particular node has. It is interpreted as a measure  
530 of popularity and influence a node has at the local level. In weighted networks, each edge is leaden  
531 by a specific weight and the degree of a node is the sum of the weights of the associated edges and  
532 it is hence also known as *vertex strength*. Mathematically, the degree centrality of node  $j$  ( $k_j$ ) can be  
533 computed as:

$$k_j = \sum_{i \neq j} A_{ij} w_{ij}, \quad (2)$$

534 where  $A_{ij}$  is the adjacency matrix defining the connections of the graph ( $A_{ij} = 1$ , if  $i$  is in contact  
535 distance with  $j$  and  $A_{ij} = 0$ , otherwise), and  $w_{ij}$  is the weight matrix defining the strength in the  
536 connection between any two nodes.

537

538 *Eigenvector centrality* measures the influence a node has at a wider scale than degree. It quantifies  
539 the influence of a node given that of its neighbors. For example, a given node  $j$  has many edges and  
540 hence it would have a high degree centrality. But if its neighboring nodes have few or no connections,  
541 the influence of them is rather small and it will lead to a small eigenvector centrality for the node  
542  $j$ . On the other hand, if the node  $j$  is connected with a few other nodes, it would hold a small  
543 value of degree centrality, but if these neighboring nodes are robustly connected, node  $j$  would hold  
544 an indirect influence over the additional nodes, which makes the eigenvector centrality of the node  $j$   
545 higher. Thus, eigenvector centrality is a measure of influence on a larger scale. Mathematically, the  
546 eigenvector centrality of the node  $j$  is given by the  $j$ -th entry of the eigenvector ( $\vec{x}$ ) of the adjacency  
547 matrix ( $A$ ) associated to its largest eigenvalue ( $\lambda$ ). In closed form, the full eigenvector satisfies the  
548 following equation:

$$A\vec{x} = \lambda\vec{x} \quad (3)$$

549 *Closeness centrality* measures how far a particular node is from all the other nodes in the network  
550 according to their associated pathlength, which quantifies the distance between any two nodes in a  
551 network. For weighted networks, the pathlength between node  $i$  and node  $j$  ( $d_{ij}$ ), is the sum of the  
552 weights associated to the edges that comprise the network path between node  $i$  and node  $j$ . Therefore,  
553 nodes holding higher values of closeness centrality are located, on average, at a shorter distance from  
554 all the rest of the nodes and hence are able spread information more efficiently throughout the graph.  
555 For a network with  $n$  number of nodes, the closeness centrality of the  $j$ -th node is defined as the  
556 inverse of the average distance ( $\ell_j$ ) between a particular node and the rest of the nodes.

$$C_j = \frac{1}{\ell_j} = \frac{n}{\sum_i d_{ij}} \quad (4)$$

557 Finally, *betweenness centrality* quantifies the number of shortest pathways (also called geodesics) a  
558 particular node takes part on that connects any two other nodes. Hence, nodes with high betweenness  
559 are critical at establishing efficient bridges between distant regions of the network. The removal of  
560 these high-betweenness nodes can ultimately lead to the disruption of the network, and therefore their  
561 role is key for the stability and resiliency of it. Formally, betweenness centrality of node  $j$  ( $b_j$ ) in an  
562 arbitrary network can be expressed as:

$$b_j = \sum_{s \neq t \neq j} \frac{\sigma_{st,j}}{\sigma_{st}}, \quad (5)$$

563 where  $\sigma_{st}$  is the total number of geodesics connecting nodes  $s$  and  $t$ , while  $\sigma_{st,j}$  is the number of  
564 geodesics connecting node  $s$  to node  $t$  that pass through node  $j$ .

565

## 566 Acknowledgments

567 PDM and RM were supported by Los Alamos National Laboratory (LANL) Director's Fellowship.



568 SC was supported by the Center of Nonlinear Studies Postdoctoral program. KN and SG were par-  
569 tially supported by the DOE national laboratories focused on response to COVID-19, with funding  
570 providing by the Coronavirus CARES Act. BK and SG were partially supported by LANL LDRD  
571 project 20200706ER. This research used computational resources from LANL Institutional Computing  
572 Program. We thank Rory Henderson for insightful discussions.

## 573 References

- 574 [1] P. Zhou, XL. Yang, XG. Wang et al. A pneumonia outbreak associated with a new coronavirus  
575 of probable bat origin. *Nature*, **579**, 270–273 (2020).
- 576 [2] F. Wu, S. Zhao, B. Yu et al. A new coronavirus associated with human respiratory disease in  
577 China. *Nature*, **579**, 265–269 (2020)
- 578 [3] WHO Coronavirus (COVID-19) Dashboard (latest seen on 7/9/2021 at 2:21 PM MT) <https://covid19.who.int/>  
579
- 580 [4] Kirchdoerfer, R., Cottrell, C., Wang, N. et al. Pre-fusion structure of a human coronavirus spike  
581 protein. *Nature* **531**, 118–121 (2016)
- 582 [5] A.C. Walls, Y. Park, M. A. Tortorici, A. Wall, A. T. McGuire, D. Velesler. Structure, function,  
583 and antigenicity of the SARS-CoV-2 Spike glycoprotein. *Cell*, **180**, 281-292, (2020).
- 584 [6] Y. Huang, C. Yang, X. Xu, W. Xu, S. Liu. Structural and functional properties of SARS-CoV-2  
585 spike protein: potential antiviral drug development for COVID-19. *Acta Pharmacologica Sinica*  
586 **41**, 1141-1149 (2020)
- 587 [7] D. Wrapp, N. Wang, K.S. Corbett, J. A. Goldsmith, C. Hsieh, O. Abiona, B.S. Graham, J. S.  
588 McLellan. Cryo-EM structure of the 2019-nCoV spike in the prefusion conformation. *Science*, **367**,  
589 1260-1263, (2020)
- 590 [8] D. Kim, J.Y. Lee, J.S. Yang, J.W. Kim, V.N. Kim, H. Chang. The architecture of SARS-CoV-2  
591 transcriptome. *Cell*, **181**, 914-921, (2020)
- 592 [9] Q. Wang, Y. Zhang, L. Wu, S. Niu, C. Song, Z. Zhang, G. Lu, C. Qiao, Y. Hu, K.Y. Yuen, Q.  
593 Wang, H. Zhou, J. Yan, J. Qi. Structural and functional basis of SARS-CoV-2 entry by using  
594 human ACE2. *Cell*, **181**, 894-904, (2020)
- 595 [10] J. Lan, J. Ge, J. Yu, S. Shan, H. Zhou, S. Fan, Q. Zhang, X. Shi, Q. Wang, L. Zhang, X. Wang.  
596 Structure of the SARS-CoV-2 spike receptor-binding-domain bound to the ACE2 receptor. *Nature*,  
597 **581**, 215-220, (2020)
- 598 [11] R. Mansbach, S. Chakraborty, K. Nguyen, D. Montefiori, B. Korber, S. Gnanakaran. The SARS-  
599 CoV-2 Spike variant D614G favors an open conformational state. *Sci. Adv.*, **7** :eabf3671 (2021)
- 600 [12] D. C. Groves, S. L. Rowland-Jones, A. Angyal. The D614G mutations in the SARS-CoV-2 spike  
601 protein: Implications for viral infectivity, disease severity and vaccine design. *Biochemical and*  
602 *Biophysical Research Communications*, **538**, pp 104-107, (2021)
- 603 [13] W. Fischer, E. Giorgi, S. Chakraborty, et al. HIV-1 and SARS-CoV-2: Patterns in the evolution  
604 of two pandemic pathogens. *Cell Host Microbe*. **29**, 7:1093-1110 (2021).
- 605 [14] B. Korber, W. M. Fischer, S. Gnanakaran, H. Yoon, J. Theiler, W. Abfalterer, N. Hengartner,  
606 E.E.Giorgi, T. Bhattacharya, B. Foley, K. M. Hastie, M. D. Parker, D.G. Partridge, C. M.  
607 Evans, T.M. Freeman, T.I. de Silva, C. McDanal, L. G.Perez, H. Tang, A. Moon-Walker, S. P.  
608 Whelan, C.C. LaBranche, E. O. Saphire, D. C. Montefiori. Tracking Changes in SARS-CoV-2  
609 Spike: Evidence that D614G Increases Infectivity of the COVID-19 Virus. *Cell*, **182**, 4, (2020)

- 610 [15] J. Zhang, Y. Cai, T. Xiao, J. Lu, H. Peng, S.M. Sterling, R.M. Walsh Jr. S. Rits-Volloch, H. Zhu,  
611 A.N. Woosley, W. Yang, P. Sliz, B. Chen. Structural impact on SARS-CoV-2 spike protein by  
612 D614G substitution. *Science*, **372**, 525-530, (2021)
- 613 [16] L. Zhang, C.B. Jackson, H. Mou, A. Ojha, H. Peng, B.D. Quinlan, E.S. Rangarajan, A. Pan,  
614 A. Vanderheiden, M.S. Suthar, W. Li, T. Izard, C. Rader, M. Farzan, H. Choe. SARS-CoV-  
615 2 spike-protein D614G mutation increases virion spike density and infectivity. *Nat. Comm.* **11**,  
616 6013, (2020)
- 617 [17] D. Weissman, M. Alameh, T. de Silva, P. Collini, H. Hornsby, R. Brown, C.C. LaBranche, R.J.  
618 Edwards, L. Sutherland, S. Santra, K. Mansouri, S. Gobeil, C. McDanal, N. Pardi, N. Hengartner,  
619 P.J.C. Lin, Y. Tam, P.A. Shaw, M.G. Lewis, C. Boesler, U. Şahin, P. Acharya, B.F. Haynes,  
620 B. Korber, D.C. Montefiori. D614G Spike Mutation Increases SARS CoV-2 Susceptibility to  
621 Neutralization. *Cell Host & Microbe*. **29**, 1, (2021)
- 622 [18] A. Wrobel, D. Benton, P. Xu, P. et al. SARS-CoV-2 and bat RaTG13 spike glycoprotein structures  
623 inform on virus evolution and furin-cleavage effects. *Nat. Struct. Mol. Biol.* **27**, 763–767 (2020)
- 624 [19] S. Gobeil, K. Janowska, S. McDowell, K. Mansouri, R. Parks, K. Manne, V. Stalls, M.F. Kopp, R.  
625 Henderson, R.J. Edwards, B.F. Haynes, P. Acharya. D614G mutation alters SARS-CoV-2 spike  
626 conformation and enhances protease cleavage at the S1/S2 junction. *Cell Reports*, **34**, 108630,  
627 (2021)
- 628 [20] T. Peacock, D. Goldhill, J. Zhou, et al. The furin cleavage site in the SARS-CoV-2 spike protein  
629 is required for transmission in ferrets. *Nat. Microbiol.* (2021)
- 630 [21] A. Saito, T. Irie, R. Suzuki, T. Maemura, H. Nasser, K. Uriu, Y. Kosugi, K. Shirakawa, et al.  
631 SARS-CoV-2 spike P681R mutation, a hallmark of the Delta variant, enhances viral fusogenicity  
632 and pathogenicity. bioRxiv 2021.06.17.448820; doi: <https://doi.org/10.1101/2021.06.17.448820>
- 633 [22] B. Lubinski, L.E. Frazier, My V.T. Phan, D.L. Bugembe, et al. Spike protein cleavage-  
634 activation mediated by the SARS-CoV-2 P681R mutation: a case-study from its first appear-  
635 ance in variant of interest (VOI) A.23.1 identified in Uganda. bioRxiv 2021.06.30.450632; doi:  
636 <https://doi.org/10.1101/2021.06.30.450632>
- 637 [23] A. Lauring, E. Hodcroft. Genetic variants of SARS-CoV-2 - What do they mean? *Journal of the*  
638 *Anerical Medical Association*, **325**, 6, 529–531, (2021)
- 639 [24] K. D. McCormick, J. L. Jacobs, J. W. Mellors. The emerging plasticity of SARS-CoV-2. *Science*,  
640 **371**, 6536, (2021)
- 641 [25] X. Chi, R. Yan, J. Zhang, G. Zhang, Y. Zhang, M. Hao, Z. Zhang, P. Fan, Y. Dong, Y. Yang,  
642 Z. Chen, Y. Guo, J. Zhang, Y. Li, X. Song, Y. Chen, L. Xia, L. Fu, L. Hou, J. Xu, C. Yu, J. Li,  
643 Q. Zhou, W. Chen. A neutralizing human antibody binds to the N-terminal domain of the Spike  
644 protein of SARS-Cov-2. *Science*, **369**, 650-655 (2020)
- 645 [26] K. R. McCarthy, L.J. Rennick, S. Nambulli, L.R. Robinson-McCarthy, W.G. Bain, G. Haidar,  
646 W. P. Duprex. Recurrent deletions in the SARS-CoV-2 spike glycoprotein drive antibody escape.  
647 *Science* **371**, 1139-1142 (2021)
- 648 [27] M. McCallum, A. De Marco, F. Lempp, M. Tortorici, D. Pinto, A.C. Walls, M. Beltramello, A.  
649 Chen, Z. Liu, F. Zatta, et. al. N-terminal domain antigenic mapping reveals a site of vulnerability  
650 for SARS-CoV-2. *Cell*, **184**, 2332-2347, (2021)
- 651 [28] G. Cerutti, Y. Guo, T. Zhou, J. Gorman, M. Lee, M. Rapp, E.R. Reddem, J. Yu, F. Bahna, J.  
652 Bimela, Y. Huang, P.S. Katsamba, L. Liu, M.S. Nair, R. Rawi, A.S. Olia, P. Wang, B. Zhang, G.  
653 Chuang, D.D. Ho, Z. Sheng, P.D. Kwong, L. Shapiro. Potent SARS-CoV-2 neutralizing antibodies  
654 directed against spike N-terminal domain target a single supersite. *Cell Host & Microbe*, **29**, 5,  
655 (2021)

- 656 [29] N. Suryadevara, S. Shrihari, P. Glichuk, L.A. VanBlargan, E. Binshtein, S.J. Zost, R.S. Nargi,  
657 R.E. Sutton, E.S. Winkler, E.C. Chen, M.E. Fouch, E. Davidson, B.J. Doranz, R.E. Chen, P. Shi,  
658 R.H. Carnahan, L.B. Thackray, M. Diamond, J.E. Crowe, Jr. Neutralizing and protective human  
659 monoclonal antibodies recognizing the N-terminal domain of the SARS-CoV-2 spike protein. *Cell*,  
660 **184**, 2316-2331, (2021)
- 661 [30] A. Sethi, J. Eargle, A.A. Black, Z. Luthey-Schulten. Dynamical networks in tRNA:protein com-  
662 plexes. *PNAS*, **106**, 16, (2009)
- 663 [31] C. Xu, Y. Wang, C. Liu, et al. Conformational dynamics of SARS-CoV-2 trimeric spike glyco-  
664 protein in complex with receptor ACE2 revealed by cryo-EM. *Science Advances*, **7**, 1, (2021)
- 665 [32] D.J. Benton, A.G. Wrobel, C. Roustan, A. Borg, P. Xu, S.R. Martin, P.B. Rosenthal, J.J. Skehel,  
666 S.J. Gamblin. The effect of the D614G substitution on the structure of the spike glycoprotein of  
667 SARS-CoV-2. *PNAS* **118**, 9, (2021)
- 668 [33] T. Lemmin, D. Kalbermatterc, D. Harderc, P. Plattetd, D. Fotiadis. Structures and dynamics  
669 of the novel S1/S2 protease cleavage site loop of the SARS-CoV-2 spike glycoprotein. *Journal of*  
670 *Structural Biology: X*, **4**, 100038, (2020)
- 671 [34] FACT SHEET FOR HEALTH CARE PROVIDERS EMERGENCY USE AUTHORIZATION  
672 (EUA) OF REGEN-COVTM (casirivimab and imdevimab) [https://www.fda.gov/media/](https://www.fda.gov/media/145611/download)  
673 [145611/download](https://www.fda.gov/media/145611/download) (Accessed on 6/27/2021)
- 674 [35] P. Raghuvamsi, N. Tulsian, F. Samsudin, X. Qian, K. Purushotorman, G. Yue, M. Kozma, W.  
675 Hwa, J. Lescar, P.J. Bond, P. MacAry, G. Anand. SARS-CoV-2 S protein:ACE2 interaction  
676 reveals novel allosteric targets. *eLife*, **10**, e636446, (2021)
- 677 [36] Y. Xing, X. Li, X. Gao, Q. Dong. Natural Polymorphisms Are Present in the Furin Cleavage Site  
678 of the SARS-CoV-2 Spike Glycoprotein. *Frontiers in Genetics*, **11**, 783, (2020)
- 679 [37] A. Kwarteng, E. Asiedu, A. A. Sylverken, A. Larbi, A. A. Sakyi, S. O. Asiedu. Molecular charac-  
680 terization of interactions between the D614G variant of SARS-CoV-2 S-protein and neutralizing  
681 antibodies: A computational approach.
- 682 [38] A. Barrat, M. Barthélemy, R. Pastor-Satorras, A. Vespignani. The architecture of complex  
683 weighted networks. *PNAS*, **101**, 11, (2004)
- 684 [39] I.E. Antoniou, E.T. Tsompa. Statistical analysis of weighted networks. *Discrete Dynamics in*  
685 *Nature and Society*. **2008**, 375452, (2008)
- 686 [40] H. Tegally, E. Wilkinson, M. Giovanetti, et al. Detection of a SARS-CoV-2 variant of concern in  
687 South Africa. *Nature* **592**, 438-443 (2021)
- 688 [41] W. Zhang, B.D. Davis, S.S Chen, J.M. Sincuir Martinez, J.T. Plummer, E. Vail. Emergence of a  
689 Novel SARS-CoV-2 Variant in Southern California. *JAMA*, **325**, 13 (2021)
- 690 [42] M. C. Castro, S. Kim, L. Barberia, A. Freitas Ribeiro, et al. Spatiotemporal pattern of COVID-19  
691 spread in Brazil. *Science*, 821-826, (2021)
- 692 [43] S. Cherian, V. Potdar, S. Jadhav, P. Yadav, N. Gupta, M. Das, P. Rakshit, S. Singh, P.a Abraham,  
693 S. Panda, NIC team. Convergent evolution of SARS-CoV-2 spike mutations, L452R, E484Q and  
694 P681R, in the second wave of COVID-19 in Maharashtra, India. *Biorxiv*, 2021.2004.2022.440932,  
695 <https://doi.org/10.1101/2021.04.22.440932> (2021)
- 696 [44] D. Planas, D. Veyer, A. Baidaliuk, et al. Reduced sensitivity of SARS-CoV-2 variant Delta to  
697 antibody neutralization. *Nature*, (2021) <https://doi.org/10.1038/s41586-021-03777-9>
- 698 [45] Variant proportions. Center for Disease Control and Prevention. [https://covid.cdc.gov/covid-](https://covid.cdc.gov/covid-data-tracker/#variant-proportions)  
699 [data-tracker/#variant-proportions](https://covid.cdc.gov/covid-data-tracker/#variant-proportions) (Accessed on 7/17/2021)

- 700 [46] Public Health England. Variants distribution of cases. [https://www.gov.uk/government/publications/covid-](https://www.gov.uk/government/publications/covid-19-variants-genomically-confirmed-case-numbers/variants-distribution-of-case-data-9-july-2021)  
701 19-variants-genomically-confirmed-case-numbers/variants-distribution-of-case-data-9-july-2021  
702 (2021)
- 703 [47] McCallum M, Bassi J, De Marco A, Chen A, Walls AC, et al. SARS-CoV-2 immune evasion by  
704 the B.1.427/B.1.429 variant of concern. *Science*, **373**, 6555:648-654 doi: 10.1126/science.abi7994  
705 (2021)
- 706 [48] A. Sethi, J. Tian, C.A. Derdeyn, B. Korber, S. Gnanakaran. A mechanistic understanding of  
707 allosteric immune escape pathways in the HIV-1 envelope glycoprotein. *PLOS Computational*  
708 *Biology*, **9**, 5, (2013)
- 709 [49] A.S. Fokas, D.J. Cole, S.E. Ahnert, A.W. Chin. Residue geometry networks: a rigidity-based  
710 approach to the amino acid network and evolutionary rate analysis. *Scientific Reports*, **6**, 33213,  
711 (2016)
- 712 [50] M. Melo, R. Bernardi, C. de la Fuente-Nunez, Z. Luthey-Shulten. Generalized correlation-based  
713 dynamical network analysis: a new high-performance approach for identifying allosteric com-  
714 munications in molecular dynamics trajectories. *The Journal of Chemical Physics*, **153**, 134104  
715 (2020)
- 716 [51] D. Pinto, Y.J. Park, M. Beltramello, et al. Cross-neutralization of SARS-CoV-2 by a human  
717 monoclonal SARS-CoV antibody. *Nature* **583**, 290–295 (2020)
- 718 [52] L. Yurkovetskiy, X. Wang, K. E. Pascal, C. Tomkins-Tinch, T. P. Nyalile, Y. Wang, A. Baum, W.  
719 E. Diehl, A. Dauphin, C. Carbone, K. Veinotte, S. B. Egri, S. F. Schaffner, J. E. Lemieux, J. B.  
720 Munro, A. Rafique, A. Barve, P. C. Sabeti, C. A. Kyratsous, N. V. Dudkina, K. Shen, J. Luban.  
721 Structural and Functional Analysis of the D614G SARS-CoV-2 Spike Protein Variant. *Cell*, **183**,  
722 3, (2020)
- 723 [53] S. Gobeil, K. Janowska, S. McDowell, K. Mansouri, R. Parks, K. Manne, V. Stalls, M. Kopp,  
724 R. Henderson, R. Edwards, B. Haynes, P. Acharya. D614G Mutation Alters SARS-CoV-2 Spike  
725 Conformation and Enhances Protease Cleavage at the S1/S2 Junction. *Cell Rep.* **34**, 2, (2021)
- 726 [54] T. Meirson, D. Bomze, G. Markel. Structural basis of SARS-CoV-2 spike protein induced by  
727 ACE2. *Bioinformatics*, **37**, 7, (2021)
- 728 [55] A. Halder, A. Anto, V. Subramanyan, M. Bhattacharyya, S. Vishveshwara, S. Vishveshwara.  
729 Surveying the Side-Chain Network Approach to Protein Structure and Dynamics: The SARS-  
730 CoV-2 Spike Protein as an Illustrative Case. *Frontiers in Molecular Biosciences*, **7**, 379, 2020
- 731 [56] G.M. Verkhivker and L. Di Paola. Dynamic Network Modeling of Allosteric Interactions and  
732 Communication Pathways in the SARS-CoV-2 Spike Trimer Mutants: Differential Modulation of  
733 Conformational Landscapes and Signal Transmission via Cascades of Regulatory Switches. *The*  
734 *Journal of Physical Chemistry B*, **125**, 3, (2021)
- 735 [57] M. Ghorbani, B. Brooks, J. Klauda. Exploring dynamics and network analysis of spike glycopro-  
736 tein of SARS-COV-2. *Biophys J.* **120**, 14, (2021)
- 737 [58] C. Krempl, Beate Schiltze, H. Laude, G. Herrler. Point mutations in the S protein connect the  
738 sialic acid binding activity with the enteropathogenicity of transmissible. *J. Virol.*, **71**, 4, (1997)
- 739 [59] F. Künkel, G. Herrler. Structural and functional analysis of the surface protein of human coron-  
740 avirus OC43. *Virology*, **195**, 195-202 (1993)
- 741 [60] G. Lu, Q. Wang, G. Gao. Bat-to-human: spike features determining 'host jump' of coronaviruses  
742 SARS-CoV, MERS-CoV, and beyond. *Trends in Microbiology*, **23**, 8, (2015)



- 743 [61] A. Wrobel, D. Benton, P. Xu, L. Calder, A. Borg, C. Roustan, S. Martin, P. Rosenthal, J. Skehel,  
744 S. Gamblin. Structure and binding properties of Pangolin-CoV spike glycoprotein inform the  
745 evolution of SARS-CoV-2. *Nature Communications*, **12**, 837, (2021)
- 746 [62] M. E. J. Newman. *Networks: An Introduction*. Oxford University Press. New York, 2010

1 **Supplementary Information - Network analysis outlines strengths and weaknesses of emerging**  
2 **SARS-CoV-2 Spike variants**

3  
4 P.D. Manrique<sup>1</sup>, S. Chakraborty<sup>1,2</sup>, K. Nguyen<sup>1</sup>, R. Mansbach<sup>3</sup>, B. Korber<sup>1</sup>, S. Gnanakaran<sup>1,\*</sup>  
5 <sup>1</sup> *Theoretical Biology and Biophysics Group, Los Alamos National Laboratory, Los Alamos, NM 87545, U.S.A.*  
6 <sup>2</sup> *Center for Nonlinear Studies, Los Alamos National Laboratory, Los Alamos, NM 87545, U.S.A.*  
7 <sup>3</sup> *Physics Department, Concordia University, Montreal, Quebec, Canada, H4B IR6*  
8 \*Correspondence: gnana@lanl.gov (SG)

9 **Contents**

- 10 **A.** Spike network generalities  
11 **B.** Communications core of the Spike protein  
12 **C.** Shortest paths to receptor-binding-domain (RBD)  
13 **D.** Involvement of the hinge residues of the up-RBD in shortest paths from 614  
14 **E.** Impact of residue modification/deletions in the protein network  
15 **F.** High frequency mutable residues  
16 **G.** Harnessing centrality measures to characterize functionality regions in the N-terminal domain

## 17 A. Spike network generalities

18  
19 We construct the network representations of the Spike protein using the contact matrices and correlation of  
20 fluctuations associated to extensive all-atom molecular dynamics (MD) simulations of the D- and G-form,  
21 and in the all-down and one-up conformations of the receptor-binding-domain (RBD). An edge is established  
22 between residue  $i$  and residue  $j$  if the Euclidean distance of their heavy atoms are  $6\text{\AA}$  or less for at least 75%  
23 of the simulation frames. The undirected edges in our networks are weighted according to the correlations  
24 of pair of residues. Higher correlated residues (either positively or negatively) establish shorter path lengths  
25 than uncorrelated residues. The basic properties of the resultant networks are listed in Table S1. The first six  
26 columns list the number of intra- and inter-protomer edges, followed by the total number of edges ( $m$ ), the  
27 average number of edges per node or mean degree ( $\bar{k}$ ), the average vertex strength ( $\bar{k}^{(w)}$ ), the average path  
28 length ( $\ell$ ), and the unweighted and weighted clustering coefficients ( $C$  and  $C^{(w)}$ , respectively). The latter  
29 two measures quantify how well are the neighbors of a particular node linked to each other. It is a measure  
30 of local cohesiveness of the network. An average over all nodes provides a global level of cohesiveness. Given  
31 that the weighted coefficient is greater than the unweighted one, indicates that interconnected triplets in  
32 the Spike protein are more likely formed by the edges with larger weights (higher correlations). In addition,  
33 the average path length points to stronger correlations in the all-down conformation than in the one-up,  
34 and also stronger in the G-Form than the D-Form. This result is echoed by the average vertex strength  
35 capturing higher values for the G-Form, as well. These contrasts are interesting and point directly to the  
36 dynamical effects, given that the topological values alone such as  $m$  and  $\bar{k}$ , which do not account for the  
37 correlations, are very similar to each other for the four networks.

| Spike conf. | LL   | UU   | RR   | LU  | UR  | RL  | $m$   | $\bar{k}$ | $\bar{k}^{(w)}$ | $\ell$ | $C$    | $C^{(w)}$ |
|-------------|------|------|------|-----|-----|-----|-------|-----------|-----------------|--------|--------|-----------|
| all-down D  | 5826 | 5654 | 5668 | 232 | 221 | 216 | 17817 | 10.47     | 189.59          | 1.822  | 0.5010 | 0.5535    |
| one-up D    | 5669 | 5640 | 5831 | 240 | 224 | 261 | 17865 | 10.50     | 153.59          | 2.325  | 0.4995 | 0.5522    |
| all-down G  | 5763 | 5632 | 5713 | 208 | 209 | 225 | 17750 | 10.43     | 204.86          | 1.724  | 0.5005 | 0.5525    |
| one-up G    | 5703 | 5657 | 5828 | 223 | 200 | 221 | 17832 | 10.48     | 157.58          | 2.036  | 0.5037 | 0.5558    |

Table S1: Basic network characteristics of the Spike protein. The properties outlined are: the number of intra-protomer edges (LL, UU, RR), inter-protomer edges (LU, UR, RL), total number of edges ( $m$ ), mean unweighted degree ( $\bar{k}$ ), mean weighted degree ( $\bar{k}^{(w)}$ ), average pathlength ( $\ell$ ), unweighted average clustering coefficient ( $C$ ), weighted clustering coefficient ( $C^{(w)}$ ).

38 We further characterize the differences between the D- and G-Form of the Spike protein by looking at  
39 differences in the topology of the networks. A comparison between the adjacency matrices of the different  
40 networks provides the specific connections (i.e., edges) that are present in one network and absent in another  
41 one. Comparing the D- with the G-Form, we find that for the one-up conformation, a total of 676 edges are  
42 in the G-Form but not in the D-Form, while 709 are in the D-Form and absent in the G-Form. These values  
43 quantify the gain and loss edges, respectively, that the G-Form has over the D-Form. The net change is  
44 1385 edges between G and D in the one-up conformation. In a like manner, the net change for the all-down  
45 conformation is 1445 edges, where 689 edges are gained, and 756 edges are lost. Figure S1 quantifies the  
46 excess edges (gain and loss), when we look at the specific domains/regions (see Fig. 1 of the main paper  
47 for the definition). As shown, for both conformations, the largest changes happen in the edges belonging  
48 to the NTD and the RBD. Fewer changes in the edges are found within the remaining regions, while no  
49 change occurs within the CT0. Looking at the inter-region changes, we find that the largest gain and loss  
50 in the all-down conformation occurs in the S2S2' region, where the connection to the FPR is strengthened  
51 while the inter-region connection with the CH is weakened. By the same token, in the one-up conformation  
52 we find that the connections between CT0 and CT2, and between S2S2' with FPR and with CH, are all  
53 weakened, while the connection between S2S2' with HR1, is strengthened.

54  
55 The results presented in the Table S1 were average values over the whole protein. Figure S3 details the  
56 region/domain level as well as the single-residue level behavior of the vertex strength and weighted clustering

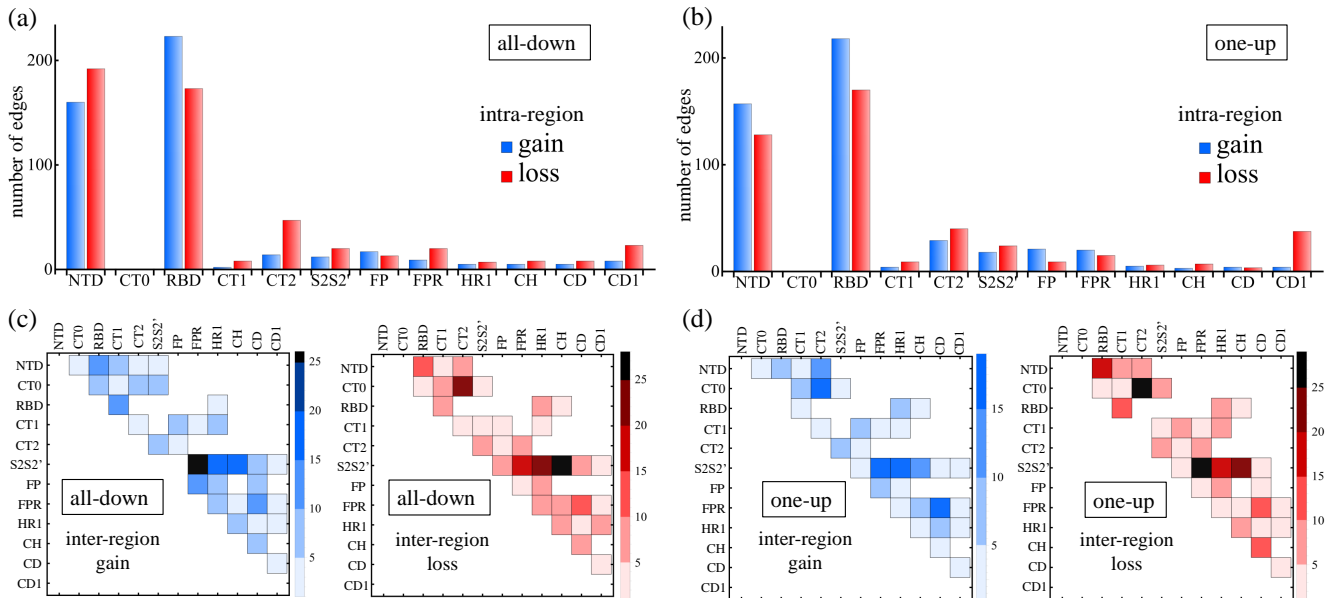

Figure S1: Comparison between the networks of the D- and G-Form using the excess of edges for the different regions/domains (see Fig. 1 for the definitions). Blue means a gain of edges of G over D while red means a loss of edges of G over D. (a-b) Intra-region edge differences. (c-d) Inter-region edge differences. The all-down conformation is shown in (a) and (c), while the one-up conformation in (b) and (d).

57 coefficient. As shown, the N-terminal domain (NTD) is dominant in the vertex strength measurement for all  
 58 three protomers and all networks. This is in contrast with the clustering coefficient (Fig. S3(b)), where the  
 59 values for most residues and all regions/domains are well balanced with each other. The weighted clustering  
 60 coefficient for residue  $i$  is computed using Vespignani et. al. [1] expression for weighted networks:

$$C_i^{(w)} = \frac{1}{k_i^{(w)}(k_i - 1)} \sum_{j,h} \frac{w_{ij} + w_{ih}}{2} a_{ij} a_{ih} a_{jh}, \quad (1)$$

61 where  $k_i^{(w)}$  is the vertex strength of node  $i$ ,  $k_i$  is the unweighted degree,  $w_{ij}$  is the edge weight connecting  
 62 nodes  $i$  and  $j$ , and  $a_{ij}$  is the adjacency matrix element associated to nodes  $i$  and  $j$ .

63

## 64 B. Communication core of the Spike protein

65

66 Table S2 details the number of residues belonging to specific regions (see Fig. 1 of main paper, and Fig.  
 67 S2) in the Spike for the top-50 ranking according to betweenness centrality. These residues comprise the  
 68 communications ring depicted in the Figure 2 of the main draft. As shown, a greater participation of CT0  
 69 is found in the G-form, which is also characterized by an enhanced stability in the number of residues for  
 70 each of the regions when we compare the all-down and one-up conformations. A detailed list of the top-50  
 71 residues ranked by betweenness centrality for the four networks is provided in the Table S3.

|                 | NTD | CT1 | CT2 | CT0 |
|-----------------|-----|-----|-----|-----|
| D-form/all-down | 19  | 11  | 8   | 9   |
| D-form/one-up   | 15  | 13  | 21  | 1   |
| G-form/all-down | 17  | 15  | 6   | 12  |
| G-form/one-up   | 13  | 14  | 6   | 17  |

Table S2: Region/domain participation (number of residues involved) within the communication ring for the D- and G-form in the all-down and one-up conformations.



### Top 50 high betweenness residues for the G form

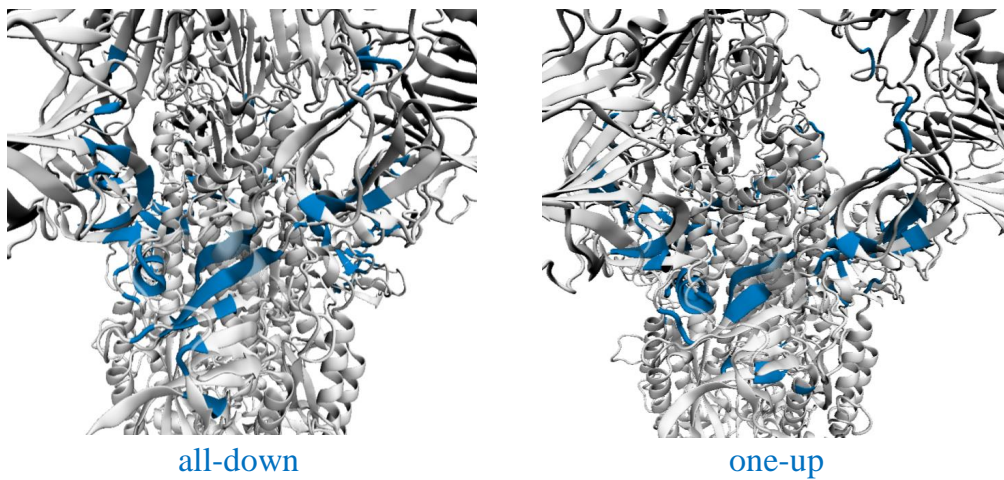

Figure S2: Top 50 residues with the highest values of betweenness centrality forming the communication core of the Spike protein. Illustration drawn for the G form in the one-up (left) and the all-down conformations (right)

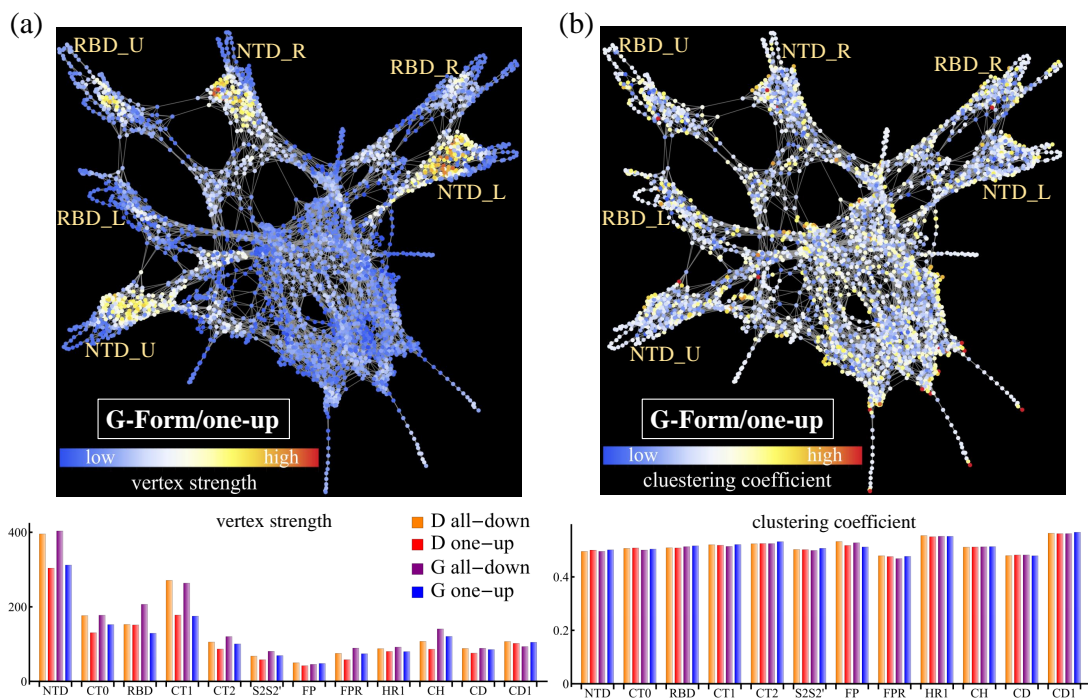

Figure S3: (a) Vertex strength in the one-up conformation of the G-Form in the network representation of the Spike protein (top panel), and vertex strength for the D- and G-Forms in the all-down and one-up conformations broken down by domains/regions (bottom). (b) Clustering coefficient in the one-up conformation of the G-Form in the network representation of the Spike protein (top panel), and clustering coefficients for the D- and G-Forms in the all-down and one-up conformations broken down by domains/regions (bottom).

| D-form/all-down |         |                    | D-form/one-up |         |                    | G-form/all-down |         |                    | G-form/one-up |         |                    |
|-----------------|---------|--------------------|---------------|---------|--------------------|-----------------|---------|--------------------|---------------|---------|--------------------|
| region          | residue | betweenness        | region        | residue | betweenness        | region          | residue | betweenness        | region        | residue | betweenness        |
| NTD             | S297_U  | $1.72 \times 10^6$ | CT2           | V597_L  | $1.01 \times 10^6$ | CT0             | V320_R  | $1.28 \times 10^6$ | CT2           | V597_L  | $1.08 \times 10^6$ |
| NTD             | L296_U  | $1.66 \times 10^6$ | CT2           | V597_R  | 928258             | CT0             | F318_R  | $1.22 \times 10^6$ | NTD           | S297_L  | $1.01 \times 10^6$ |
| CT0             | V320_U  | $1.53 \times 10^6$ | CT1           | G566_U  | 922602             | CT0             | N317_R  | $1.21 \times 10^6$ | NTD           | L296_L  | $1.01 \times 10^6$ |
| CT0             | R319_U  | $1.52 \times 10^6$ | NTD           | R44_R   | 909094             | CT0             | T315_R  | $1.18 \times 10^6$ | CT0           | V320_L  | 961043             |
| CT0             | F318_U  | $1.51 \times 10^6$ | CT2           | V595_L  | 851495             | CT0             | S316_R  | $1.18 \times 10^6$ | CT0           | R319_L  | 960795             |
| NTD             | Y279_U  | $1.38 \times 10^6$ | CT2           | V595_U  | 849469             | CT2             | V597_R  | $1.03 \times 10^6$ | CT0           | F318_L  | 941009             |
| NTD             | R44_U   | $1.38 \times 10^6$ | NTD           | L296_L  | 846836             | CT1             | L552_R  | 990742             | CT1           | F565_L  | 875319             |
| CT1             | G566_L  | $1.32 \times 10^6$ | NTD           | S297_L  | 843956             | CT1             | V551_R  | 990594             | CT0           | F318_U  | 866657             |
| CT1             | G566_U  | $1.2 \times 10^6$  | CT2           | G593_L  | 833754             | CT1             | C538_R  | 977307             | CT1           | V576_L  | 865061             |
| CT1             | A575_L  | $1.19 \times 10^6$ | CT2           | F592_L  | 833622             | NTD             | R44_U   | 976806             | CT0           | V320_U  | 861754             |
| CT1             | A575_U  | $1.18 \times 10^6$ | CT2           | G594_L  | 833423             | CT0             | R319_L  | 940940             | CT0           | T315_U  | 855051             |
| CT1             | I587_U  | $1.18 \times 10^6$ | CT1           | C590_L  | 820818             | CT0             | F318_L  | 940562             | CT0           | S316_U  | 853834             |
| CT1             | C538_U  | $1.16 \times 10^6$ | CT2           | S596_U  | 800920             | CT0             | V320_L  | 932228             | CT0           | N317_U  | 852772             |
| CT2             | V597_U  | $1.15 \times 10^6$ | CT1           | A575_U  | 797432             | CT0             | N317_L  | 927872             | NTD           | D290_L  | 809650             |
| CT1             | V551_U  | $1.14 \times 10^6$ | CT2           | V597_U  | 794295             | CT1             | C538_L  | 917349             | CT0           | V320_R  | 741902             |
| CT2             | V595_U  | $1.14 \times 10^6$ | CT2           | S596_L  | 790348             | CT1             | G566_L  | 904403             | CT0           | F318_R  | 741118             |
| CT2             | S596_U  | $1.14 \times 10^6$ | CT1           | I587_U  | 789084             | CT2             | F592_U  | 863330             | CT1           | V551_L  | 741081             |
| CT1             | C538_L  | $1.14 \times 10^6$ | CT1           | V576_L  | 743093             | NTD             | P295_R  | 862415             | CT0           | R319_R  | 738820             |
| CT1             | V551_L  | $1.13 \times 10^6$ | CT1           | T588_U  | 737910             | CT1             | C590_U  | 862286             | CT1           | L552_L  | 738663             |
| CT1             | L552_L  | $1.13 \times 10^6$ | CT1           | C590_U  | 735819             | NTD             | D294_R  | 860246             | CT1           | L585_L  | 737992             |
| CT1             | D586_L  | $1.11 \times 10^6$ | NTD           | L276_U  | 732330             | CT0             | V308_U  | 831310             | CT2           | S596_L  | 735785             |
| NTD             | K278_U  | $1.1 \times 10^6$  | NTD           | Y279_R  | 723910             | NTD             | C291_R  | 820395             | CT2           | V595_L  | 734241             |
| CT0             | V320_L  | $1.1 \times 10^6$  | NTD           | K278_R  | 721182             | CT2             | V595_U  | 784027             | CT1           | C538_L  | 728821             |
| NTD             | V289_U  | $1.1 \times 10^6$  | CT2           | S591_U  | 720331             | CT2             | G594_U  | 779075             | NTD           | Y279_U  | 718238             |
| NTD             | A288_U  | $1.1 \times 10^6$  | CT2           | F592_U  | 720193             | CT2             | G594_U  | 778918             | NTD           | F43_U   | 710466             |
| CT2             | V597_L  | $1.09 \times 10^6$ | NTD           | D290_L  | 719393             | NTD             | R44_L   | 736157             | NTD           | R44_U   | 706687             |
| CT0             | R319_L  | $1.09 \times 10^6$ | NTD           | K300_U  | 719390             | CT1             | G566_R  | 731982             | NTD           | P57_L   | 696421             |
| CT0             | F318_L  | $1.08 \times 10^6$ | CT2           | G594_U  | 714378             | CT1             | A575_R  | 701646             | NTD           | L56_L   | 696024             |
| NTD             | P295_L  | $1.04 \times 10^6$ | NTD           | L276_R  | 713872             | CT0             | F306_U  | 696022             | CT2           | I664_U  | 676359             |
| NTD             | L276_R  | 949065             | CT2           | G593_U  | 713713             | NTD             | Y279_U  | 678263             | CT2           | I670_R  | 654870             |
| NTD             | L277_R  | 916886             | NTD           | L277_R  | 712150             | NTD             | K278_U  | 675650             | CT2           | G669_R  | 654435             |
| NTD             | L293_L  | 911165             | CT2           | C671_U  | 646368             | CT1             | V551_U  | 662846             | CT1           | S530_U  | 636062             |
| NTD             | D294_L  | 908653             | CT2           | S591_R  | 642849             | CT1             | L552_U  | 661948             | CT1           | K528_U  | 633144             |
| CT0             | V308_R  | 858046             | CT1           | C590_R  | 641995             | CT1             | D586_R  | 656010             | CT1           | K529_U  | 631971             |
| NTD             | K300_R  | 853131             | CT0           | R328_U  | 640887             | NTD             | T274_R  | 645961             | NTD           | L276_U  | 618830             |
| NTD             | F58_L   | 847875             | CT2           | F592_R  | 639899             | NTD             | R273_R  | 638207             | NTD           | L277_U  | 612963             |
| NTD             | P57_L   | 789889             | NTD           | L277_U  | 629095             | CT0             | T315_L  | 633670             | CT0           | Y313_U  | 611506             |
| NTD             | L56_L   | 789183             | CT1           | V576_U  | 616462             | NTD             | L270_R  | 632052             | CT0           | Q314_U  | 609766             |
| CT2             | V595_L  | 780325             | CT1           | S530_U  | 614864             | NTD             | Q271_R  | 631478             | NTD           | K278_U  | 599051             |
| CT2             | S596_L  | 773370             | CT1           | K529_U  | 612302             | NTD             | C291_L  | 630026             | CT1           | C538_U  | 596039             |
| CT0             | K310_R  | 752957             | CT2           | I670_U  | 611603             | NTD             | E298_L  | 624214             | CT1           | V551_U  | 585234             |
| CT0             | E309_R  | 750877             | CT1           | K528_U  | 611114             | CT1             | V551_L  | 620519             | CT1           | L552_U  | 584019             |
| CT2             | I664_R  | 725737             | CT2           | V595_R  | 594692             | CT1             | L552_L  | 619554             | CT1           | V551_R  | 551659             |
| NTD             | R44_R   | 702033             | CT2           | S596_R  | 590924             | NTD             | L276_R  | 600233             | CT1           | C538_R  | 551062             |
| NTD             | S45_R   | 695434             | CT1           | L585_L  | 581346             | CT1             | A575_L  | 599019             | CT0           | V308_U  | 538623             |
| NTD             | Y279_R  | 682479             | NTD           | R44_U   | 575030             | NTD             | Y279_R  | 596696             | NTD           | K300_U  | 537585             |
| S2S2'           | I692_U  | 568037             | NTD           | Y279_U  | 571436             | NTD             | R44_R   | 593659             | CT0           | K310_R  | 536400             |
| FPR             | M869_R  | 568011             | NTD           | F43_U   | 568408             | CT2             | I598_U  | 590405             | CT0           | V308_R  | 535633             |
| FPR             | L864_L  | 556447             | NTD           | K278_U  | 567140             | NTD             | L277_R  | 589463             | CT0           | E309_R  | 535529             |
| CT2             | V608_U  | 550331             | CT2           | G594_R  | 562228             | CT1             | D586_L  | 587652             | NTD           | R44_R   | 516465             |

Table S3: Top-50 residues ranked by betweenness centrality for our four networks (D- and G-form in the one-up and all-down conformations). Regions where the residues belong to as well as the values of betweenness centrality are also listed for reference.

72 **C. Shortest paths to receptor-binding-domain (RBD)**

73

74 Tables S4 and S5 provide detailed lists of pathways and path lengths to residue 501 of the U protomer,  
 75 from residue 614 and from the furin cleavage site (FCS) 685, respectively, of all three protomers. In our  
 76 calculations, we consider all residues from RBM and FCS. For simplicity, we list the details for these  
 77 two source/target residues only. The network representation for the case of the G-form in the one-up  
 78 conformation, as well as the average path lengths, are depicted in Fig. S4

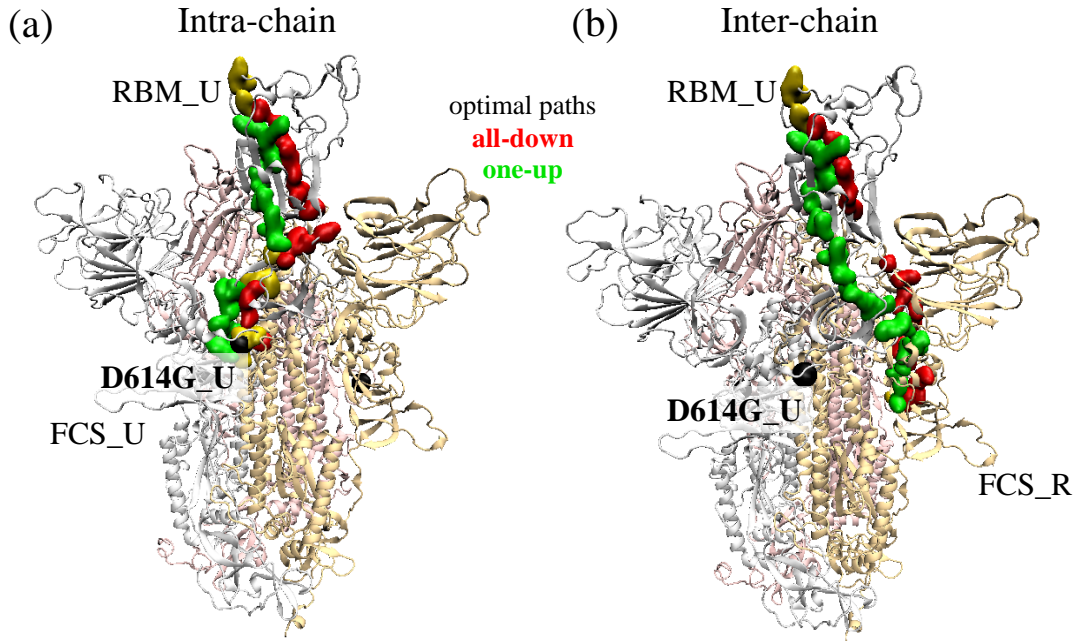

Optimum paths from residue 614 to RBM residue 501 in G-form **all-down** and **one-up** conformations. Residues common to both pathways are shown in yellow.

(c) Network representation

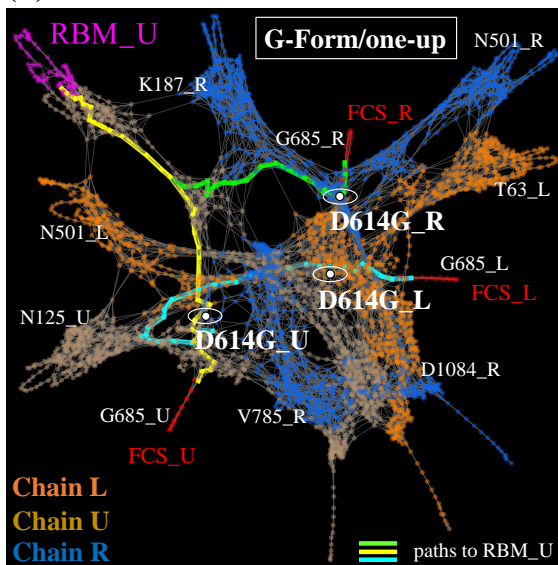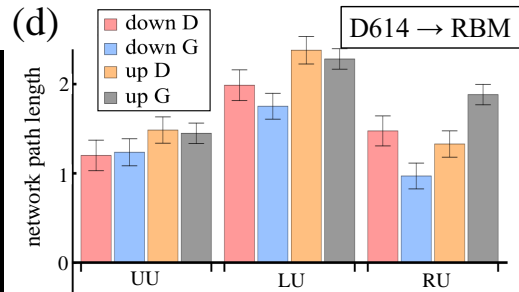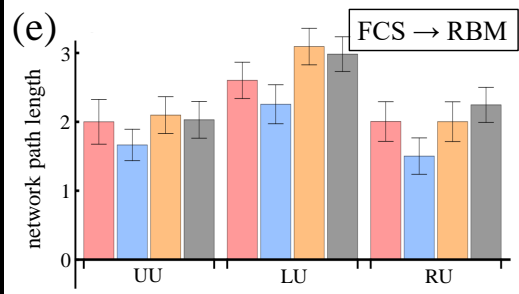

Figure S4: Optimal paths from residue 614 of the U protomer (a) and the R protomer (b) to the RBM residue 501 of the U protomer. (c) Pathways to RBM\_U in the network representation of the Spike protein from the FCS 685 for each of the protomers (colored paths) for the one-up conformation in the G-Form in the network representation of the Spike protein. Paths pass next residue 614 (white nodes in circles). (d-e) Average path lengths to all residues of the up-RBM from residue 614 (d) and FCS (e) of the three protomers.

| source → target | length   | path (D-form/all-down)                                                                                                                                                                                                                                                                                                                                                                |
|-----------------|----------|---------------------------------------------------------------------------------------------------------------------------------------------------------------------------------------------------------------------------------------------------------------------------------------------------------------------------------------------------------------------------------------|
| D614_L→N501_U   | 1.87582  | D614_L, Q613_L, F318_L, R319_L, V320_L, C538_L, V551_L, L552_L, D586_L, A575_L, G566_L, R44_U, Y279_U, K278_U, A288_U, V289_U, S297_U, L296_U, V597_U, S596_U, V595_U, F318_U, R319_U, V320_U, P322_B, N540_U, F541_U, N542_U, N544_U, L390_U, C391_U, F515_U, S514_U, L513_U, V512_U, V511_U, V510_U, R509_U, Y508_U, P507_U, Q506_U, Y505_U, N501_U                                 |
| D614_U→N501_U   | 1.09255  | D614_U, F592_U, S591_U, C590_U, G550_U, F541_U, N542_U, N544_U, L390_U, C391_U, F515_U, S514_U, L513_U, V512_U, V511_U, V510_U, R509_U, Y508_U, P507_U, Q506_U, Y505_U, N501_U                                                                                                                                                                                                        |
| D614_R→N501_U   | 1.37853  | D614_R, Q613_R, Y612_R, L611_R, V610_R, P295_R, D294_R, L293_R, D290_R, V289_R, A288_R, V36_R, Y37_R, Y204_R, I203_R, K202_R, F201_R, Y200_R, E516_U, F515_U, S514_U, L513_U, V512_U, V511_U, V510_U, R509_U, Y508_U, P507_U, Q506_U, Y505_U, N501_U                                                                                                                                  |
| source → target | length   | path (D-form/one-up)                                                                                                                                                                                                                                                                                                                                                                  |
| D614_L→N501_U   | 2.23281  | D614_L, Q613_L, G594_L, G593_L, F592_L, C590_L, G550_L, N540_L, F541_L, V327_L, R328_L, P330_L, I332_L, N360_L, S359_L, I358_L, Y396_L, A397_L, D398_L, S399_L, F400_L, V401_L, Y451_L, L452_L, Q493_L, L492_L, F490_L, Y489_L, F377_U, A435_U, Y508_U, P507_U, Q506_U, N501_U                                                                                                        |
| D614_U→N501_U   | 1.35858  | D614_U, Q613_U, G594_U, G593_U, F592_U, S591_U, C590_U, G550_U, N540_U, F541_U, V327_U, R328_U, S530_U, K529_U, K528_U, P527_U, A363_U, F338_U, F342_U, V511_U, V510_U, R509_U, Y508_U, P507_U, Q506_U, N501_U                                                                                                                                                                        |
| D614_R→N501_U   | 1.20224  | D614_R, Q613_R, V595_R, S596_R, V597_R, T299_R, C301_R, L276_R, L277_R, K278_R, Y279_R, R44_R, G566_U, V576_U, R577_U, D578_U, R328_U, S530_U, K529_U, K528_U, P527_U, A363_U, F338_U, F342_U, V511_U, V510_U, R509_U, Y508_U, P507_U, Q506_U, N501_U                                                                                                                                 |
| source → target | length   | path (G-form/all-down)                                                                                                                                                                                                                                                                                                                                                                |
| D614G_L→N501_U  | 1.71229  | D614G_L, Q613_L, Y612_L, L611_L, V610_L, V597_L, L296_L, S297_L, V289_L, A288_L, I285_L, T284_L, G283_L, R44_L, G566_R, A575_R, D586_R, L552_R, V551_R, C538_R, V320_R, F318_R, N317_R, S316_R, T315_R, V597_R, P295_R, D294_R, C291_R, T274_R, R273_R, Q271_R, L270_R, G89_R, K195_R, F201_R, P230_R, Y396_U, A397_U, D398_U, S399_U, F400_U, V401_U, P507_U, Q506_U, T500_U, N501_U |
| D614G_U→N501_U  | 1.15282  | D614G_U, V615_U, F592_U, C590_U, C538_U, V539_U, N540_U, F541_U, V327_U, R328_U, F329_U, P330_U, I332_U, C361_U, S359_U, V395_U, Y396_U, A397_U, D398_U, S399_U, F400_U, V401_U, P507_U, Q506_U, T500_U, N501_U                                                                                                                                                                       |
| D614G_R→N501_U  | 0.930889 | D614G_R, Q613_R, Y612_R, L611_R, V610_R, V597_R, P295_R, D294_R, C291_R, T274_R, R273_R, Q271_R, L270_R, G89_R, K195_R, F201_R, P230_R, Y396_U, A397_U, D398_U, S399_U, F400_U, V401_U, P507_U, Q506_U, T500_U, N501_U                                                                                                                                                                |
| source → target | length   | path (G-form/one-up)                                                                                                                                                                                                                                                                                                                                                                  |
| D614G_L→N501_U  | 2.17649  | D614G_L, G593_L, F592_L, S591_L, C590_L, V551_L, L552_L, L585_L, V576_L, F565_L, F43_U, R44_U, Y279_U, K278_U, L277_U, L276_U, C301_U, T299_U, Y313_U, Q314_U, T315_U, S316_U, N317_U, F318_U, V320_U, Q321_U, P322_U, N540_U, F541_U, V327_U, S530_U, K529_U, K528_U, N388_U, L387_U, C432_U, V433_U, V511_U, V510_U, R509_U, Y508_U, Q506_U, N501_U                                 |
| D614G_U→N501_U  | 1.34378  | D614G_U, Q613_U, Y612_U, V595_U, T315_U, S316_U, N317_U, F318_U, V320_U, Q321_U, P322_U, N540_U, F541_U, V327_U, S530_U, K529_U, K528_U, N388_U, L387_U, C432_U, V433_U, V511_U, V510_U, R509_U, Y508_U, Q506_U, N501_U                                                                                                                                                               |
| D614G_R→N501_U  | 1.7775   | D614G_R, Q613_R, V595_R, S596_R, Y313_R, T299_R, C301_R, L276_R, L277_R, I285_R, T284_R, L560_U, F559_U, R577_U, D578_U, R328_U, S530_U, K529_U, K528_U, N388_U, L387_U, C432_U, V433_U, V511_U, V510_U, R509_U, Y508_U, Q506_U, N501_U                                                                                                                                               |

Table S4: Pathways to residue 501 of the up-RBM from residue 614 of all protomers for the D- and G-form, in the all-down and the one-up conformations.



| source → target | length  | path ( <b>D-form/all-down</b> )                                                                                                                                                                                                                                                                                                                                                                                                       |
|-----------------|---------|---------------------------------------------------------------------------------------------------------------------------------------------------------------------------------------------------------------------------------------------------------------------------------------------------------------------------------------------------------------------------------------------------------------------------------------|
| G685_L→N501_U   | 2.63993 | G685_L, S686_L, V687_L, A688_L, S689_L, Q690_L, S691_L, I692_L, A609_L, V610_L, L611_L, Y612_L, F318_L, R319_L, V320_L, C538_L, V551_L, L552_L, D586_L, A575_L, G566_L, R44_U, Y279_U, K278_U, A288_U, V289_U, S297_U, L296_U, V597_U, S596_U, V595_U, F318_U, R319_U, V320_U, P322_U, N540_U, F541_U, N542_U, N544_U, L390_U, C391_U, F515_U, S514_U, L513_U, V512_U, V511_U, V510_U, R509_U, Y508_U, P507_U, Q506_U, Y505_U, N501_U |
| G685_U→N501_U   | 2.05054 | G685_U, S686_U, V687_U, A688_U, S689_U, Q690_U, S691_U, I692_U, A609_U, V610_U, L611_U, Y612_U, F318_U, R319_U, V320_U, P322_U, N540_U, F541_U, N542_U, N544_U, L390_U, C391_U, F515_U, S514_U, L513_U, V512_U, V511_U, V510_U, R509_U, Y508_U, P507_U, Q506_U, Y505_U, N501_U                                                                                                                                                        |
| G685_R→N501_U   | 2.1933  | G685_R, A684_R, G683_R, S682_R, P681_R, S680_R, N679_R, T678_R, T676_R, Q675_R, Y674_R, P600_R, K310_R, E309_R, V308_R, K300_R, L276_R, L277_R, I285_R, A222_R, L223_R, Y204_R, I203_R, K202_R, F201_R, Y200_R, E516_U, F515_U, S514_U, L513_U, V512_U, V511_U, V510_U, R509_U, Y508_U, P507_U, Q506_U, Y505_U, N501_U                                                                                                                |
| source → target | length  | path ( <b>D-form/one-up</b> )                                                                                                                                                                                                                                                                                                                                                                                                         |
| G685_L→N501_U   | 3.13669 | G685_L, S686_L, V687_L, A688_L, S689_L, S691_L, I692_L, A609_L, V610_L, V595_L, G594_L, G593_L, F592_L, C590_L, G550_L, N540_L, F541_L, V327_L, R328_L, P330_L, I332_L, N360_L, S359_L, I358_L, Y396_L, A397_L, D398_L, S399_L, F400_L, V401_L, Y451_L, L452_L, Q493_L, L492_L, F490_L, Y489_L, F377_U, A435_U, Y508_U, P507_U, Q506_U, N501_U                                                                                        |
| G685_U→N501_U   | 2.11265 | G685_U, S686_U, V687_U, A688_U, S689_U, Q690_U, S691_U, I692_U, A609_U, V610_U, L611_U, V595_U, F318_U, R319_U, V320_U, Q321_U, P322_U, N540_U, F541_U, V327_U, R328_U, S530_U, K529_U, K528_U, P527_U, A363_U, F338_U, F342_U, V511_U, V510_U, R509_U, Y508_U, P507_U, Q506_U, N501_U                                                                                                                                                |
| G685_R→N501_U   | 2.07156 | G685_R, S686_R, V687_R, A688_R, S689_R, S691_R, I692_R, V608_R, L296_R, S297_R, C291_R, L276_R, L277_R, K278_R, Y279_R, R44_R, G566_U, V576_U, R577_U, D578_U, R328_U, S530_U, K529_U, K528_U, P527_U, A363_U, F338_U, F342_U, V511_U, V510_U, R509_U, Y508_U, P507_U, Q506_U, N501_U                                                                                                                                                 |
| source → target | length  | path ( <b>G-form/all-down</b> )                                                                                                                                                                                                                                                                                                                                                                                                       |
| G685_L→N501_U   | 2.24178 | G685_L, S686_L, V687_L, A688_L, S689_L, S691_L, I692_L, V608_L, L296_L, S297_L, V289_L, A288_L, I285_L, T284_L, G283_L, R44_L, G566_R, A575_R, D586_R, L552_R, V551_R, C538_R, V320_R, F318_R, N317_R, S316_R, T315_R, V597_R, P295_R, D294_R, C291_R, T274_R, R273_R, Q271_R, L270_R, G89_R, K195_R, F201_R, P230_R, Y396_U, A397_U, D398_U, S399_U, F400_U, V401_U, P507_U, Q506_U, T500_U, N501_U                                  |
| G685_U→N501_U   | 1.79819 | G685_U, S686_U, V687_U, A688_U, S689_U, S691_U, I692_U, I598_U, V597_U, S596_U, V595_U, G594_U, G593_U, F592_U, C590_U, C538_U, V539_U, N540_U, F541_U, V327_U, R328_U, F329_U, P330_U, I332_U, C361_U, S359_U, V395_U, Y396_U, A397_U, D398_U, S399_U, F400_U, V401_U, P507_U, Q506_U, T500_U, N501_U                                                                                                                                |
| G685_R→N501_U   | 1.57206 | G685_R, S686_R, V687_R, A688_R, S689_R, S691_R, I692_R, A609_R, V597_R, P295_R, D294_R, C291_R, T274_R, R273_R, Q271_R, L270_R, G89_R, K195_R, F201_R, P230_R, Y396_U, A397_U, D398_U, S399_U, F400_U, V401_U, P507_U, Q506_U, T500_U, N501_U                                                                                                                                                                                         |
| source → target | length  | path ( <b>G-form/one-up</b> )                                                                                                                                                                                                                                                                                                                                                                                                         |
| G685_L→N501_U   | 2.99415 | G685_L, S686_L, V687_L, A688_L, S689_L, S691_L, I692_L, A609_L, V610_L, L611_L, Y612_L, F318_L, R319_L, V320_L, C538_L, V551_L, L552_L, L585_L, V576_L, F565_L, F43_U, R44_U, Y279_U, K278_U, L277_U, L276_U, C301_U, T299_U, Y313_U, Q314_U, T315_U, S316_U, N317_U, F318_U, V320_U, Q321_U, P322_U, N540_U, F541_U, V327_U, S530_U, K529_U, K528_U, N388_U, L387_U, C432_U, V433_U, V511_U, V510_U, R509_U, Y508_U, Q506_U, N501_U  |
| G685_U→N501_U   | 2.03041 | G685_U, S686_U, V687_U, A688_U, S689_U, S691_U, I692_U, A609_U, V610_U, S596_U, T315_U, S316_U, N317_U, F318_U, V320_U, Q321_U, P322_U, N540_U, F541_U, V327_U, S530_U, K529_U, K528_U, N388_U, L387_U, C432_U, V433_U, V511_U, V510_U, R509_U, Y508_U, Q506_U, N501_U                                                                                                                                                                |
| G685_R→N501_U   | 2.42439 | G685_R, S686_R, V687_R, A688_R, S689_R, S691_R, I692_R, P600_R, K310_R, E309_R, V308_R, F306_R, L48_R, V47_R, R44_R, F43_R, F565_U, V576_U, R577_U, D578_U, R328_U, S530_U, K529_U, K528_U, N388_U, L387_U, C432_U, V433_U, V511_U, V510_U, R509_U, Y508_U, Q506_U, N501_U                                                                                                                                                            |

Table S5: Pathways to residue 501 of the up-RBM from residue 685 of all protomers for the D- and G-form, in the all-down and the one-up conformations.

## D. Involvement of the hinge residues of the up-RBD in shortest paths from 614

We explore the role of hinges  $H_1$  (residues 320-336) and  $H_2$  (residues 516-536) residues at connecting residue 614 to the RBM employing the Floyd-Warshall algorithm to compute the shortest pathways.

### Method i

We quantify the involvement of each of the hinges by counting the number of times a residue belonging to a particular hinge is identified to belong to a shortest path ( $H_i$  role column). We examine the total set of 854 paths accounting for all the source/target combinations of the three protomers for our four Spike configurations: D form all-down, D form one-up, G form all-down, and G form one-up.

We find that in the all-down configuration there is a marked preference for using  $H_1$  over  $H_2$ , and using routes that do not pass through the hinges. This finding is more prominent in the D form than the G form. The one-up configuration is characterized by the use of both hinges at comparable amounts with a small preference towards  $H_1$ , and a highly more frequent use of the hinge residues in the G form than in the D form. Finally, the use of  $H_1$  occurs more frequent for intra-protomer pathways, while  $H_2$  is found more often for inter-protomer pathways.

#### D form / all-down

| source | target | $H_1$ role | residues               | $H_2$ role | residues |
|--------|--------|------------|------------------------|------------|----------|
| D614_U | RBM_U  | 0          | -                      | 0          | -        |
| D614_L | RBM_U  | 198        | V320_L, V320_U, P322_U | 0          | -        |
| D614_R | RBM_U  | 0          | -                      | 24         | E516_U   |

#### D form / one-up

| source | target | $H_1$ role | residues                       | $H_2$ role | residues                       |
|--------|--------|------------|--------------------------------|------------|--------------------------------|
| D614_U | RBM_U  | 142        | V327_U, R328_U                 | 284        | P527_U, K528_U, K529_U, S530_U |
| D614_L | RBM_U  | 284        | V327_L, R328_L, P330_L, I332_L | 0          | -                              |
| D614_R | RBM_U  | 71         | R328_U                         | 284        | P527_U, K528_U, K529_U, S530_U |

#### G form / all-down

| source  | target | $H_1$ role | residues                               | $H_2$ role | residues |
|---------|--------|------------|----------------------------------------|------------|----------|
| D614G_U | RBM_U  | 280        | V327_U, R328_U, F329_U, P330_U, I332_U | 0          | -        |
| D614G_L | RBM_U  | 71         | V320_R                                 | 0          | -        |
| D614G_R | RBM_U  | 0          | -                                      | 0          | -        |

#### G form / one-up

| source  | target | $H_1$ role | residues                       | $H_2$ role | residues               |
|---------|--------|------------|--------------------------------|------------|------------------------|
| D614G_U | RBM_U  | 284        | V320_U, Q321_U, P322_U, V327_U | 213        | K528_U, K529_U, S530_U |
| D614G_L | RBM_U  | 284        | V320_U, Q321_U, P322_U, V327_U | 213        | K528_U, K529_U, S530_U |
| D614G_R | RBM_U  | 71         | R328_U                         | 213        | K528_U, K529_U, S530_U |

105 **Method ii**

106 To complement the analysis, we consider the role of suboptimal residues and whether or not hinge residues  
 107 can be present within this group. To this end, we count the hinge residues in the top-50 suboptimal group  
 108 connecting 614 with RBM. As a general rule, it is found that the usage of H<sub>1</sub> is more prominent than H<sub>2</sub>,  
 109 especially in the D form. Also, the all-down configuration tends to use H<sub>1</sub> residues on a greater proportion  
 110 than H<sub>2</sub> residues. The suboptimal residues are identified by comparing the direct pathlength from 614 and  
 111 RBM with an indirect pathway that go through an additional third node. The difference in the length  
 112 of these pathways provides a score of how good this third node is at connecting 614 and RBM through a  
 113 suboptimal path.

114  
 115 D form / all-down

| path | H <sub>1</sub> (optimal) | H <sub>2</sub> (optimal) | H <sub>1</sub> (suboptimal) | H <sub>2</sub> (suboptimal) | H <sub>1</sub> sum | H <sub>2</sub> sum |
|------|--------------------------|--------------------------|-----------------------------|-----------------------------|--------------------|--------------------|
| UU   | 0                        | 0                        | 4                           | 0                           | 4                  | 0                  |
| LU   | 3                        | 0                        | 3                           | 0                           | 6                  | 0                  |
| RU   | 0                        | 1                        | 0                           | 0                           | 0                  | 1                  |

117 D form / one-up

| path | H <sub>1</sub> (optimal) | H <sub>2</sub> (optimal) | H <sub>1</sub> (suboptimal) | H <sub>2</sub> (suboptimal) | H <sub>1</sub> sum | H <sub>2</sub> sum |
|------|--------------------------|--------------------------|-----------------------------|-----------------------------|--------------------|--------------------|
| UU   | 2                        | 4                        | 7                           | 7                           | 9                  | 11                 |
| LU   | 4                        | 0                        | 7                           | 0                           | 11                 | 0                  |
| RU   | 1                        | 4                        | 3                           | 1                           | 4                  | 5                  |

119 G form / all-down

| path | H <sub>1</sub> (optimal) | H <sub>2</sub> (optimal) | H <sub>1</sub> (suboptimal) | H <sub>2</sub> (suboptimal) | H <sub>1</sub> sum | H <sub>2</sub> sum |
|------|--------------------------|--------------------------|-----------------------------|-----------------------------|--------------------|--------------------|
| UU   | 5                        | 0                        | 3                           | 7                           | 8                  | 7                  |
| LU   | 1                        | 0                        | 2                           | 0                           | 3                  | 0                  |
| RU   | 0                        | 0                        | 0                           | 0                           | 0                  | 0                  |

121 G form / one-up

| path | H <sub>1</sub> (optimal) | H <sub>2</sub> (optimal) | H <sub>1</sub> (suboptimal) | H <sub>2</sub> (suboptimal) | H <sub>1</sub> sum | H <sub>2</sub> sum |
|------|--------------------------|--------------------------|-----------------------------|-----------------------------|--------------------|--------------------|
| UU   | 4                        | 3                        | 6                           | 7                           | 10                 | 10                 |
| LU   | 4                        | 3                        | 5                           | 3                           | 9                  | 6                  |
| RU   | 1                        | 3                        | 2                           | 2                           | 3                  | 5                  |

123 **E. Impact of residue modification/deletions in the protein network**

124 The relevance of a particular node in a network can change with the graph's topology. In the main  
 125 manuscript, we showed that the closeness centrality of the NTD residues modified/deleted by the Delta  
 126 variant, on average, tend to score higher than that of the NTD supersite. Here we report the centrality  
 127 scores of all modifications/deletions characteristic of the Delta variant, as well as, the deletions reported in  
 128 the Alpha and Beta variants [2]. In the latter we focus in deletions since in the Alpha variant there are no  
 129 substitutions in the NTD, only deletions, and for the Beta variant, we find that the deleted residues score  
 130 higher than the substitutions in the NTD.

131  
 132 Figure S5 illustrate our finding of betweenness and eigenvector centrality ranking of the modified/deleted  
 133 residues in the Delta variant compared to the rest of the residues in the protein. It is found that modi-  
 134 fied/deleted residues in Delta rank very low in these two metrics. A similar calculation but for closeness  
 135 centrality shows a different story where these critical residues occupy more dominant positions, especially  
 136 those belonging to the NTD. Figure S6(a) illustrates this finding for the all-down configuration of the Spike  
 137 protein. A comparison of the closeness centrality of the RBD sites modified by the Delta variant, scores  
 138 very similar to the RBD site associated to high-frequency mutations (sites 417, 439, 452, 484, 501) [4, 5, 6]

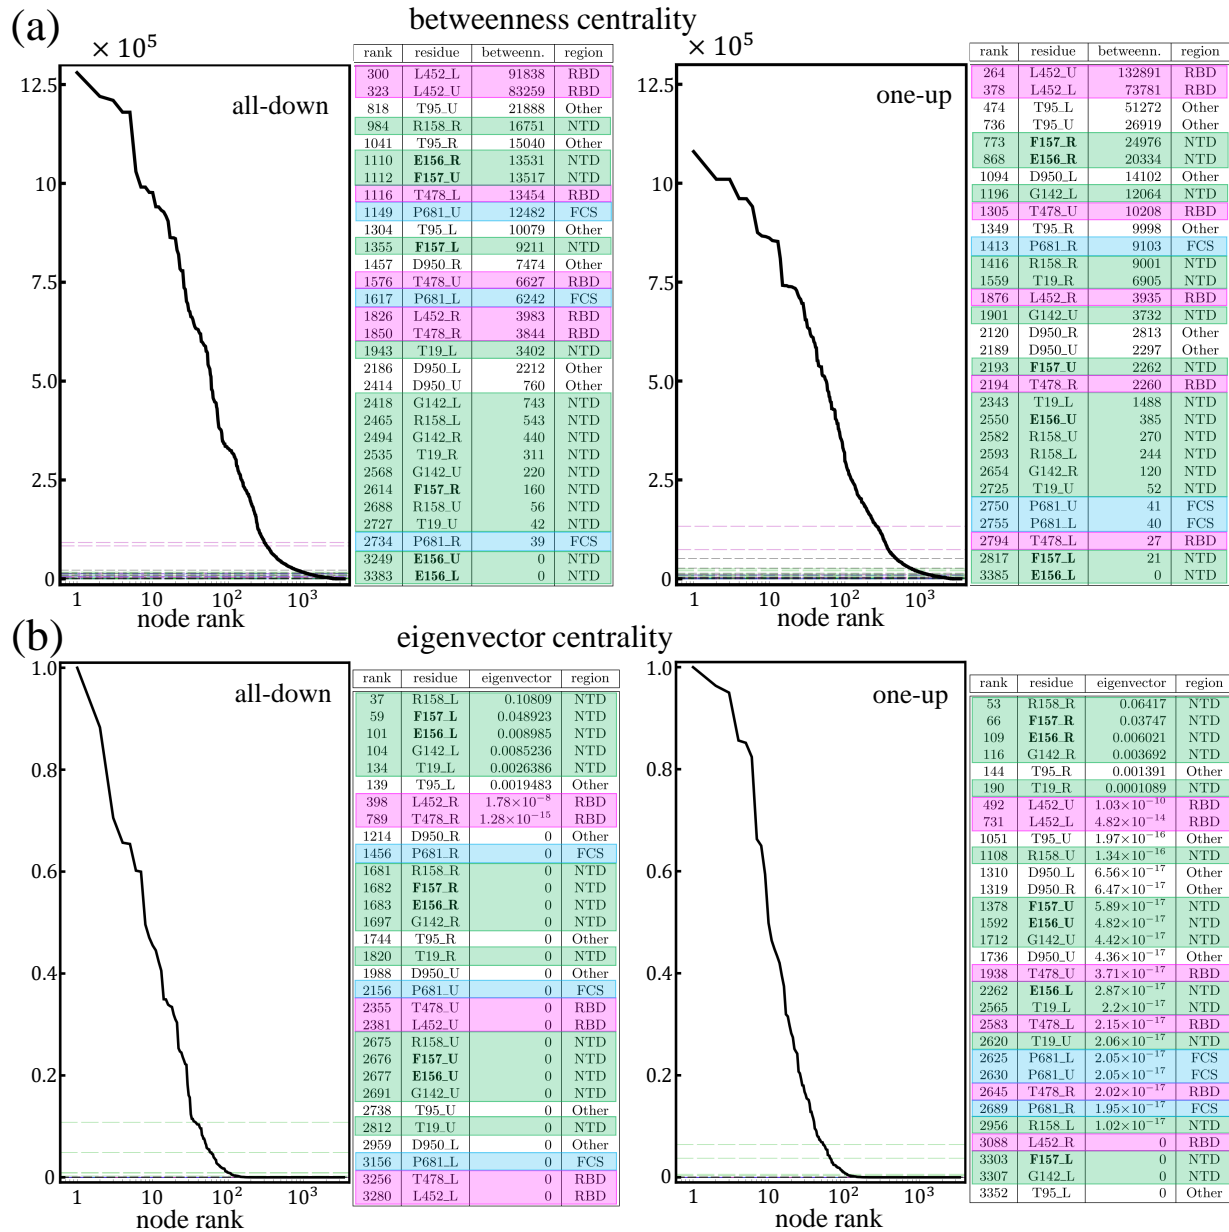

Figure S5: Betweenness (a) and eigenvector centrality (b) of residues modified by the Delta variant. Each panel shows the ranking of these residues (horizontal grid lines) within the whole protein, and a table that details specific residue information (rank, residue identity, centrality score, and protein region where the residue belongs to), for the all-down (left panel) and the one-up (right panel). Colors in the grid lines of the centrality plots and the tables are assigned by the protein region each residue belongs to: pink for RBD, green for NTD supersite, blue for FCS, and white for other regions.



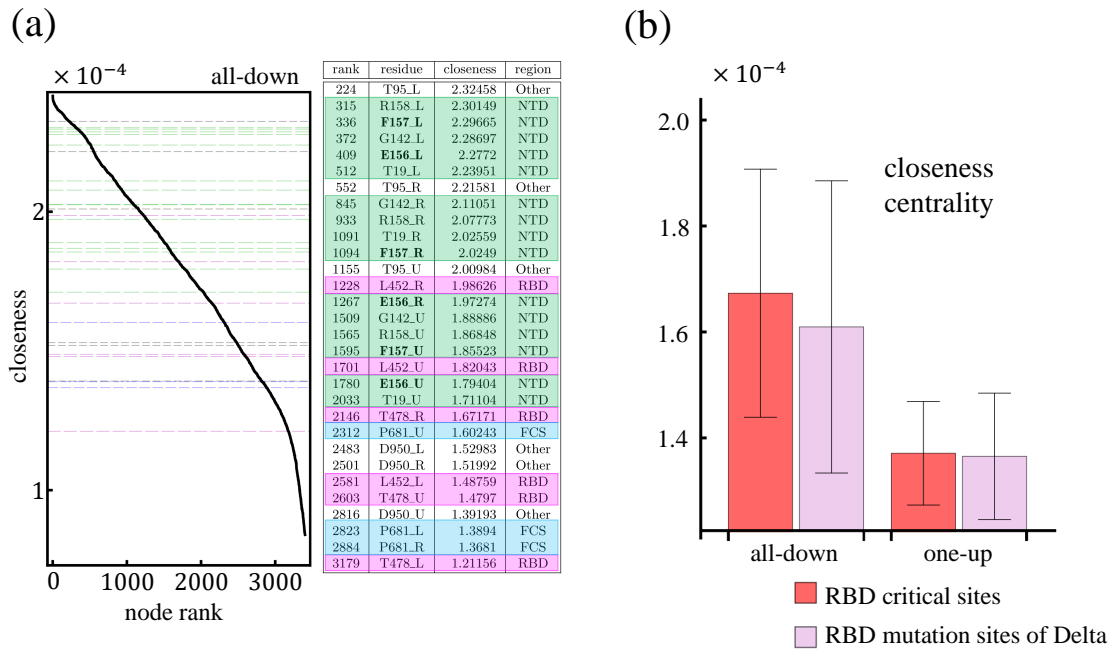

Figure S6: (a) Closeness centrality of residues modified by the Delta variant for the all-down conformation of the Spike protein. The left panel shows the ranking of these residues (horizontal grid lines) within the whole protein, and a table that details specific residue information (rank, residue identity, centrality score, and protein region where the residue belongs to), for the all-down (left panel) and the one-up (right panel). Colors in the grid lines of the centrality plots and the tables are assigned by the protein region each residue belongs to: pink for RBD, green for NTD supersite, blue for FCS, and white for other regions. (b) Average closeness centrality of the residues in the RBD modified by the Delta variant compared to the RBD sites with high frequency mutations (sites 417, 439, 452, 484, 501).

139 [Fig. S5(b)].

140

141 Examining the impact of the NTD residues altered in the Alpha, Beta, and Gamma variants of SARS-CoV-2  
 142 Spike protein. Some of these residues include deletions, reported to occur in the NTD domain, that are  
 143 linked to antibody escape and they tend to overlap with the NTD supersite [3] [Fig. S7(a)]. Using the data  
 144 from Los Alamos National Laboratory Sequence Entropy Data obtained from cov.lanl.gov database, as of  
 145 July 22, 2021, the Alpha variant is characterized by the deletion of residues 69-70, and 144, the Beta variant  
 146 the mutated residues in the NTD are 18, 80, 215, 242-244, and the Gamma variant the mutations in the  
 147 NTD are 18,20,26,138,190. Comparing the average closeness centrality of these deleted residues with that  
 148 of the NTD supersite, we find that the score of the mutations associated to the Gamma and Beta variants  
 149 rank higher [Fig. S7(b)]. The scores of the residues deleted by the Alpha variant and those of the NTD  
 150 supersite are very similar to each other, though the former is slightly larger than the latter. The ranking  
 151 of these residues within the whole protein is shown in Fig. S7(c) revealing that these key residues occupy  
 152 dominant position in the protein ranking in closeness centrality. These residues are very efficient at initiating  
 153 communication pathways capable to reach the whole protein.

154

155 A computation of the betweenness and eigenvector centralities of the residues deleted by the Alpha and Beta  
 156 variants, shows that these residues rank very low in these metrics within the entire protein [Fig. S7]. For  
 157 betweenness, we find that the impact of these residues often changes depending on which conformation we  
 158 are looking at: the all-down or the one-up. For example, residue L242\_C (deleted in the Beta variant) in the  
 159 down conformation ranks in the top 8% of most critical nodes in terms of communication (i.e., betweenness  
 160 centrality). However, in the up conformation this residue is no longer relevant carrying a value of between-  
 161 ness equal to zero. Another example is residue H69\_A (in Alpha), which in the down conformation, it helps  
 162 linking three pairs of nodes, while in the up configuration, it is found to take part in the shortest path of

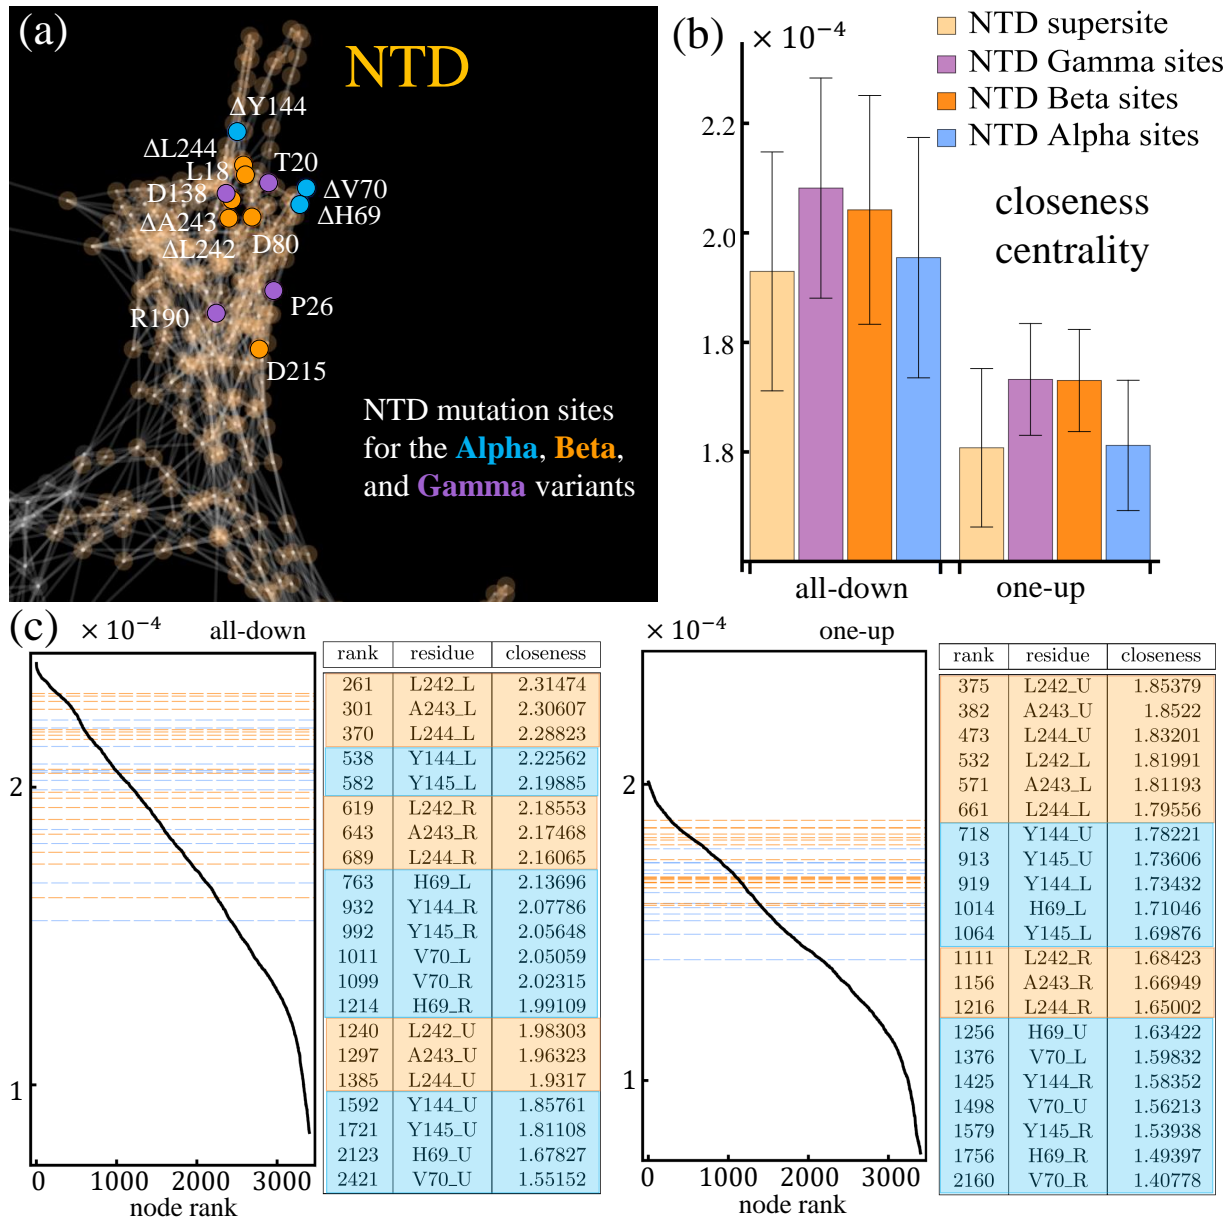

Figure S7: (a) Spike protein in the network representation highlighting the location of modified/deleted residues in the Alpha (blue), Beta (orange), and Gamma (purple) variants of the SARS-CoV-2 virus. (b) Comparison of the average closeness centrality of residues deleted by the Alpha (blue), Beta (orange), and Gamma (purple), and that of the NTD supersite (light orange). (c) Ranking of the closeness centrality for these deleted residues (horizontal grid lines) within the whole protein, and a table that details specific residue information (rank, residue identity, and centrality score times  $10^4$ ), for the all-down (left panel) and the one-up (right panel). Colors in the grid lines of the centrality plots and the tables are assigned by the variant: blue for Alpha, and orange for Beta.

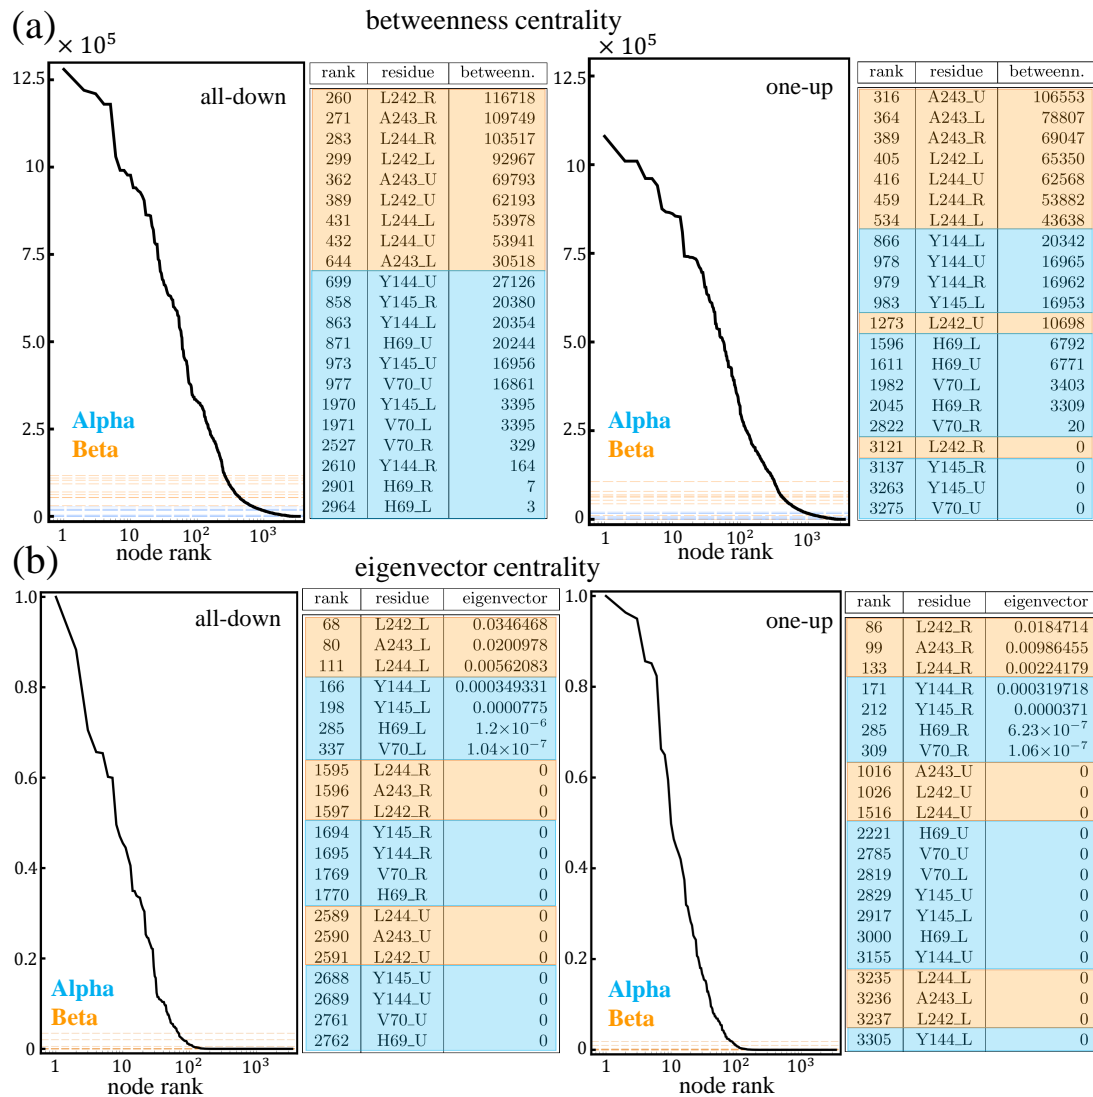

Figure S8: Betweenness (a) and eigenvector centrality (b) of deleted residues of the Alpha (blue) and Beta (variant). Each panel shows the ranking of these residues (horizontal grid lines) within the whole protein, and a table that details specific residue information (rank, residue identity, and centrality score), for the all-down (left panel) and the one-up (right panel).

163 nearly seven thousand pairs of nodes. Therefore, deletion of these two residues is likely to affect severely only  
 164 one of the conformations. On the other hand, the deletion of residues L242\_A, A243, and L244 (all three in  
 165 Beta), is expected to impact the protein the most because they hold large values of betweenness centralities  
 166 for both conformations. For the all-down G, the most relevant nodes associated to deletion mutations are  
 167 L242\_C, A243\_C, L244\_C, L242\_A (Beta). These nodes hold betweenness centrality values within the top  
 168 8% among all of the residues of the Spike. For the one-up G, residue A243\_B, A243\_A, A243\_C, L242\_A  
 169 hold values of betweenness in the top 12% among all of the residues in the Spike.

170

## 171 F. High frequency mutable residues

172 Conservation entropy measures the mutation frequency associated to each residue. Table S6 shows the  
 173 entropy for the highest mutable residues of the Spike protein alongside with their respective betweenness  
 174 centrality from our network analysis. Residues ranking below this top-60 in conservation entropy, hold  
 175 entropy values lower than the 1% of the highest ranked residue in conservation entropy. These high-frequency  
 176 mutable residues do not overlap with the top 10% of high betweenness residue ranks. Data from Los Alamos  
 177 National Laboratory Sequence Entropy Data obtained from [cov.lanl.gov](http://cov.lanl.gov) database, as of July 22, 2021.

| residue number | residue | conservation entropy | maximum betweenness | rank |
|----------------|---------|----------------------|---------------------|------|
| 17             | N       | 0.23209              | 10276               | 633  |
| 18             | L       | 0.24245              | 11147               | 621  |
| 19             | T       | 0.22808              | 6905                | 720  |
| 20             | T       | 0.13622              | 34                  | 1045 |
| 26             | P       | 0.13134              | 16691               | 528  |
| 67             | A       | 0.03743              | 13550               | 573  |
| 69             | H       | 0.69958              | 6792                | 735  |
| 70             | V       | 0.70861              | 3403                | 862  |
| 75             | G       | 0.02566              | 6770                | 746  |
| 80             | D       | 0.08328              | 6820                | 726  |
| 95             | T       | 0.22285              | 51272               | 282  |
| 98             | S       | 0.08466              | 6752                | 748  |
| 138            | D       | 0.16105              | 4798                | 809  |
| 142            | G       | 0.21869              | 12064               | 608  |
| 143            | V       | 0.02433              | 36725               | 339  |
| 144            | Y       | 0.70251              | 20342               | 467  |
| 152            | W       | 0.15643              | 6792                | 736  |
| 153            | M       | 0.03797              | 10183               | 641  |
| 156            | E       | 0.21532              | 20334               | 468  |
| 157            | F       | 0.25236              | 24976               | 420  |
| 158            | R       | 0.21555              | 9001                | 677  |
| 188            | N       | 0.11426              | 5412                | 793  |
| 190            | R       | 0.11518              | 41907               | 321  |
| 215            | D       | 0.05308              | 6718                | 755  |
| 222            | A       | 0.30369              | 121492              | 184  |
| 242            | L       | 0.03616              | 65350               | 242  |
| 243            | A       | 0.04127              | 106553              | 199  |
| 244            | L       | 0.03592              | 62568               | 248  |
| 253            | D       | 0.09903              | 10159               | 648  |
| 262            | A       | 0.04366              | 26901               | 403  |
| 272            | P       | 0.03329              | 1027                | 990  |
| 417            | K       | 0.14337              | 22                  | 1054 |
| 439            | N       | 0.06871              | 3392                | 878  |
| 452            | L       | 0.29757              | 132891              | 168  |
| 477            | S       | 0.14296              | 6835                | 725  |
| 478            | T       | 0.25073              | 10208               | 637  |
| 484            | E       | 0.23143              | 3396                | 873  |
| 494            | S       | 0.02955              | 4545                | 821  |
| 501            | N       | 0.70502              | 3322                | 889  |
| 570            | A       | 0.69536              | 2005                | 945  |
| 583            | E       | 0.02634              | 4236                | 829  |
| 614            | D       | 0.07355              | 4322                | 825  |
| 655            | H       | 0.12143              | 45                  | 1039 |
| 675            | Q       | 0.06103              | 29387               | 383  |
| 677            | Q       | 0.09388              | 12583               | 595  |
| 681            | P       | 0.88489              | 9103                | 676  |
| 688            | A       | 0.02974              | 22867               | 442  |
| 701            | A       | 0.09993              | 12471               | 598  |
| 716            | T       | 0.69338              | 161291              | 134  |
| 732            | T       | 0.07145              | 7680                | 707  |
| 769            | G       | 0.0395               | 6974                | 719  |
| 845            | A       | 0.0245               | 6797                | 733  |
| 859            | T       | 0.04505              | 12271               | 602  |
| 936            | D       | 0.02929              | 3389                | 879  |
| 939            | S       | 0.02471              | 4604                | 817  |
| 950            | D       | 0.24324              | 14102               | 562  |
| 957            | Q       | 0.03744              | 31763               | 367  |
| 982            | S       | 0.69182              | 1381                | 979  |
| 1027           | T       | 0.12039              | 50658               | 286  |
| 1118           | D       | 0.698                | 68693               | 233  |

Table S6: Top 60 highest mutable residues according to their conservation entropy score. Residues below this ranking have entropy scores below the 1% of the highest ranked residue in conservation entropy. Data from Los Alamos National Laboratory Sequence Entropy Data server [cov.lanl.gov](http://cov.lanl.gov) database, as of July 22, 2021.



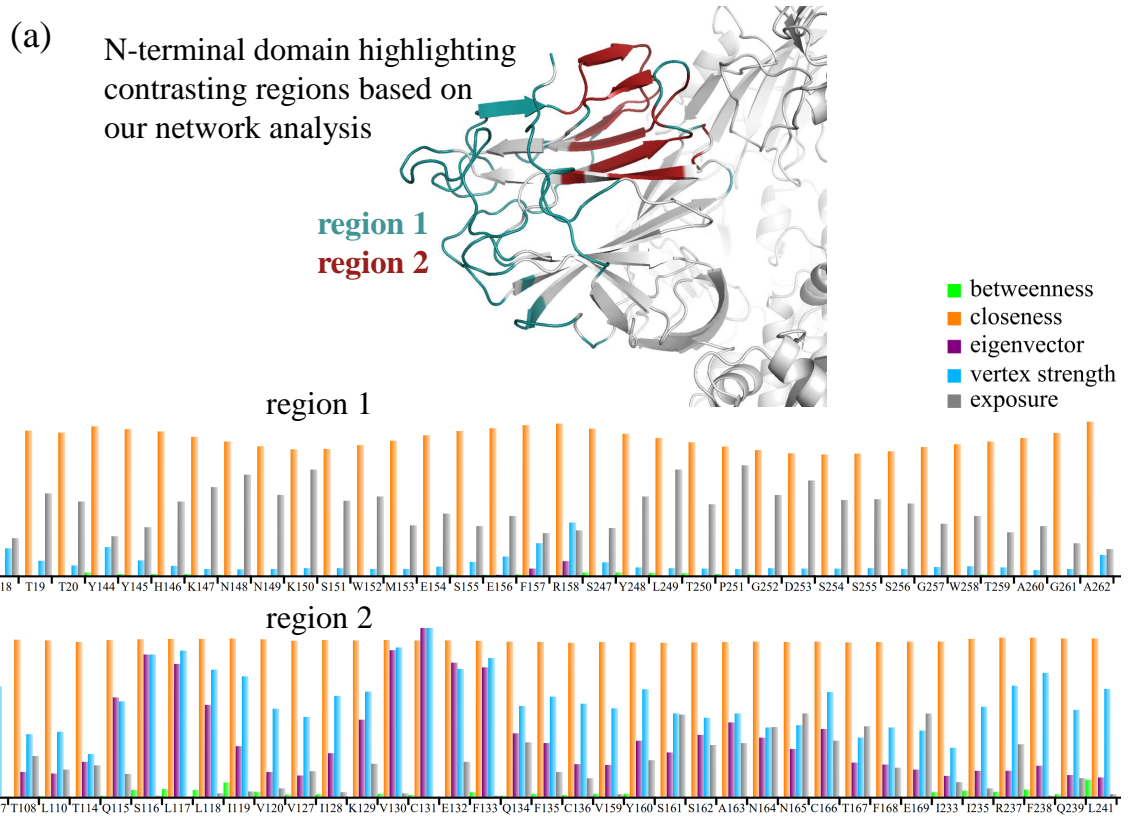

Figure S9: (a) N-terminal domain of the SARS-CoV-2 Spike protein highlighting the regions identified by our network analysis. Region 1 is characterized by specific conditions of low-betweenness, mid-closeness, low-eigenvector, and high-exposure (see text for details), while region 2 follows the sole condition of high eigenvector centrality. (b) Average centrality values of each residue in region 1 (top panel), and region 2 (bottom panel) measured as a percentage of the highest average centrality found.

## 178 G. Harnessing centrality measures to characterize functionality regions in the N-terminal domain

179 Finally, we look into how based on the centrality measures and average residue exposure, we are able to  
 180 distinguish two contrasting regions within the NTD: one region (region 1) where a large number of muta-  
 181 tions and epitopes are found, and a second one (region 2) that is potentially relevant for functionality and  
 182 where, up to August 2021, no mutations have been found. We identify region 1 by looking into residues with  
 183 low-betweenness ( $< 2.15\%$  of the highest), low-eigenvector ( $< 9\%$  of the highest), mid-closeness (between 71  
 184 and  $92\%$  of the highest), and high-exposure ( $> 16\%$  of exposure). Total exposure of each residue is obtained  
 185 from theoretical surface area calculations of Gly-X-Gly tripeptides [7]. This criteria identifies  $80.4\%$  of the  
 186 residues belonging to the NTD super site, as well as,  $63.1\%$  of the NTD residues altered by the Alpha,  
 187 Beta, Gamma, and Delta variants. On the other hand, region 2 is characterized by sole condition of having  
 188 eigenvector centrality scores higher than  $12\%$  of the highest. This single condition carries some interesting  
 189 implications for the other centrality measures. For example, we find that residues in region 2 hold a very  
 190 uniform closeness centrality values that lie between  $91$  and  $94\%$  of the highest. Similarly, we find that these  
 191 residues hold vertex strength values higher than  $25\%$  of the highest. These findings become the first step  
 192 towards predicting where the next mutations could take place and hence talk about pandemic preparedness.  
 193 Figure S9 Illustrates our finding for these contrasting regions.

194

## 195 References

196 [1] A. Barrat, M. Barthélemy, R. Pastor-Satorras, A. Vespignani. The architecture of complex weighted  
 197 networks. *PNAS*, **101**, 11, (2004)

- 198 [2] K. D. McCormick, J. L. Jacobs, J. W. Mellors. The emerging plasticity of SARS-CoV-2. *Science*, **371**,  
199 6536, (2021)
- 200 [3] K. R. McCarthy, L.J. Rennick, S. Nambulli, L.R. Robinson-McCarthy, W.G. Bain, G. Haidar, W. P.  
201 Duprex. Recurrent deletions in the SARS-CoV-2 spike glycoprotein drive antibody escape. *Science* **371**,  
202 1139-1142 (2021)
- 203 [4] W. Zhang, B.D. Davis, S.S Chen, J.M. Sincuir Martinez, J.T. Plummer, E. Vail. Emergence of a Novel  
204 SARS-CoV-2 Variant in Southern California. *JAMA*, **325**, 13 (2021)
- 205 [5] H. Tegally, E. Wilkinson, M. Giovanetti, et al. Detection of a SARS-CoV-2 variant of concern in South  
206 Africa. *Nature* **592**, 438-443 (2021)
- 207 [6] M. C. Castro, S. Kim, L. Barberia, A. Freitas Ribeiro, et al. Spatiotemporal pattern of COVID-19  
208 spread in Brazil. *Science*, 821-826, (2021)
- 209 [7] Tien MZ, Meyer AG, Sydykova DK, Spielman SJ, Wilke CO. Maximum allowed solvent accessibilities  
210 of residues in proteins. *PLoS One*, **8**, 11, e80635, (2013)
